# Supplementary material
Source: PubMed Central journal article supplement (PMC10916819)
Supplement: sj-pdf-1-eso-10.1177_23969873231209620.pdf [file sj-pdf-1-eso-10.1177_23969873231209620.pdf]

# Supplementary Materials

## Table of Contents

|                                                       |    |
|-------------------------------------------------------|----|
| 1. Supplementary Notes .....                          | 2  |
| 1.1 Study Design .....                                | 2  |
| 1.2 Nanjing Stroke Registry Program (NSRP) .....      | 2  |
| 1.2.1 Details of NSRP .....                           | 2  |
| 1.2.2 Statistical Analyses in NSRP .....              | 2  |
| 1.3 Meta-analysis .....                               | 3  |
| 1.3.1 Data Extraction and Quality Evaluation .....    | 3  |
| 1.3.2 Dose-response Meta-analysis .....               | 3  |
| 1.4 Mendelian Randomization (MR) .....                | 3  |
| 1.4.1 Selection of Instrumental Variables (IVs) ..... | 4  |
| 1.4.2 Positive Control Study .....                    | 4  |
| 1.4.3 Sensitivity analysis .....                      | 4  |
| 1.4.4 Multivariable MR Analysis .....                 | 4  |
| 2. Reference .....                                    | 5  |
| 3. Supplemental Tables .....                          | 6  |
| 4. Supplemental Figures .....                         | 37 |

# 1. Supplementary Notes

## 1.1 Study Design

In the first stage, we utilized a large-scale hospital-based prospective registry to assess this correlation.(1) In the second stage, we conducted a meta-analysis incorporated the results obtained from the registry study, along with relevant findings from other studies in the field, enhancing the overall understanding of the correlation. Finally, in the third stage, we performed a MR analysis utilizing summary data from the CKDGen and the Genetics of Ischemic Stroke Functional Outcome Network (GISCOME). Mendelian randomization allowed us to assess whether genetically determined UA was causally linked to stroke functional outcomes. This approach provided a unique perspective and added robustness to our investigation.

## 1.2 Nanjing Stroke Registry Program (NSRP)

### 1.2.1 Details of NSRP

Nanjing Stroke Registry program is the first hospital-based stroke registry program, started in July 2002, collects demographic, clinical, neuroimaging, and laboratory data from consecutively enrolled patients with stroke in mainland China.(1–3). Stroke severity was evaluated utilizing the National Institute of Health Stroke Scale (NIHSS),(4) while stroke subtypes were classified based on the Trial of ORG 10172 in Acute Stroke Treatment (TOAST) classification.(5) Laboratory data, including serum UA levels in blood samples collected within 24 hours of hospital admission, using standard laboratory procedures with urate oxidase reagent on a Dax analyzer. The interassay coefficient of variation was <3-5%.

The follow-up protocol was previously published elsewhere.(1) In brief, enrolled patients were prospectively followed up through clinical visits or telephone interviews by two certified investigators who were blinded to the baseline data. The research received approval from the Ethics Committee of Jingling Hospital, and informed consent was obtained from all participating patients.

### 1.2.2 Statistical Analyses in NSRP

The multivariable model was built in several steps: (1) inclusion of covariates with  $P < 0.1$  from univariable analyses; (2) inclusion of universal confounders (age, sex and recruitment year); (3) forward elimination of covariates with  $P < 0.1$ ; (4) removal of collinear covariates with a variance inflation factor greater than 5. To assess linear trends, the median value of each UA category was included as a continuous variable in the models. Restricted cubic spline (RCS) regression with four knots was used to explore potential nonlinear relationships. These models were adjusted for the covariates included in the multivariable model.

Subgroup analyses were performed to explore potential effect modification by factors associated with stroke prognosis. The likelihood ratio test assessed interactions between serum UA and subgroup variables for the primary outcome. Adjustment for covariates was conducted, except when the variable

was used as a subgroup variable. Propensity scores were calculated based on covariates in the multivariable logistic regression model, and cases with poor and good outcomes were matched in a 1:1 ratio using the nearest-neighbor method. Conditional logistic regression models were then fitted.

## **1.3 Meta-analysis**

### **1.3.1 Data Extraction and Quality Evaluation**

We extracted data on the first author, publication year, country, study design, sample size, follow-up duration, age, number of cases, the median or mean UA level, outcome assessment, adjusted covariates, effect value, and 95% CI. In studies where multiple multivariable-adjusted ORs were reported, we selected the effect estimate that incorporated the maximum adjustment for potential confounding factors. To evaluate the quality of the included studies, we employed the Newcastle-Ottawa Scale (NOS), which evaluates studies based on three areas: the selection of study subgroups, the comparability between subgroups, and the assessment of study endpoints.<sup>(6)</sup> In the selection of study subgroups category, we evaluated whether the group, characterized by UA levels, was truly representative of the study population. We also considered the methods used for ascertaining UA. In the comparability between subgroups category, we scrutinized whether the studies adequately accounted for potential confounders, including baseline characteristics, in the statistical analyses. The effect of UA on 90-day mRS outcomes in patients with ischemic stroke can be more accurately assessed. Lastly, the assessment of study endpoints category examines how each study assessed the outcome, considering factors such as the methodology used for assessment, the duration of the follow-up period, and the sufficiency of the follow-up data. The total score is calculated from the scores of each answer. Studies with a total score exceeding 6 (out of a total of 9) are considered to be of high quality.

### **1.3.2 Dose-response Meta-analysis**

We further collected the number of cases and participants and OR estimates with 95% CIs for each category of UA levels (excluding studies with fewer than 3 quantitative categories). We extracted the OR (95% CI) that reflected the greatest degree of control for potential confounders. The group with the lowest number of UA levels was considered the reference category in most studies. When the reference category was not the lowest, we used the methodology proposed by Hamling and his collaborators to convert the risk estimates.<sup>(7)</sup> For each category, the corresponding OR in each study was assigned the median or mean UA level. In instances where median or mean UA levels were not available per category, the midpoint between the upper and lower bounds was considered as the dose. In cases where the highest category was open-ended, the midpoint of the category was set at 1.5 times the lower limit.<sup>(8,9)</sup> A two-stage random-effects dose-response meta-analysis was conducted, considering the heterogeneity between studies, to calculate the trend based on the correlated log OR estimates across different categories of uric acid (UA) levels.<sup>(10)</sup> Additionally, a non-linearity test was performed using restricted cubic spline analysis with three knots to assess the association between UA levels and stroke prognosis.<sup>(10)</sup>

## **1.4 Mendelian Randomization (MR)**

### **1.4.1 Selection of Instrumental Variables (IVs)**

To ensure robust causal inference, the MR design depends on three crucial assumptions: (1) single-nucleotide polymorphisms (SNPs) are strongly associated with the exposure of interest; (2) the genetic variant is not related to the outcome through a confounding factor; and (3) the genetic variant affects the outcome indirectly, rather than directly, primarily through the exposure of interest.(11) To fulfill the first MR assumption, SNPs that were associated with exposure at a genome-wide significance level ( $P < 5 \times 10^{-8}$ ) and without linkage disequilibrium ( $r^2 < 0.01$  and clump window  $> 10000$  kb) were employed as IVs. To further ascertain the first assumption, we computed the proportion of the variance of UA explained by whole SNPs and the F-statistic. Instrument strength is decided on the precision and magnitude of association of the IVs with the risk factor. When the F statistic is  $> 10$ , it is considered to be sufficient.(12)

### **1.4.2 Positive Control Study**

To validate the genetic instruments of UA, we conducted positive control analyses. As gout is a well-established effect of high serum UA, we investigated the association of the exposures of interest with gout as a positive control study. In the positive control study, we utilized the same set of instrumental variables as the univariable MR analysis.

### **1.4.3 Sensitivity analysis**

To fulfill the third MR assumption, we assessed heterogeneity across estimates of SNPs for the association using Cochran's Q value.(13) We also conducted the MR-Egger intercept method and MRPRESSO global tests to detect potential pleiotropy ( $P < 0.05$  means potential pleiotropy exiting).(14,15) Furthermore, we performed Radial-MR analysis to identify outliers. Once outliers were identified, they were removed and the results were reanalyzed.(16) Finally, we conducted leave-one-out analysis and provided scatter plots depicting the associations of genetically determined serum UA levels with functional outcomes. In the reverse MR, the threshold P-value was relaxed to  $5 \times 10^{-6}$  to identify the SNPs associated with the functional outcome of ischemic stroke. Details of the instrument SNPs for the functional outcome of ischemic stroke are shown in Table S11. To discuss whether there was a collision bias in our MR results, we performed an MR study of uric acid and ischemic stroke risk.

### **1.4.4 Multivariable MR Analysis**

To fulfill the second MR assumption, we examined associations between instrument SNPs and potential confounding factors in the PhenoScanner database. If the traits associated with SNP were potential confounders, we conducted multivariable MR analysis to account for correlated pleiotropy. PhenoScanner search revealed significant associations between instruments and BMI, CAD, CKD, and T2D. Hence, we performed multivariable MR analysis to assess the impact of confounding factors (CKD, BMI, CAD, and T2D) on the association between UA and stroke outcomes. (17)

## 2. Reference

1. Liu X, Xu G, Wu W, Zhang R, Yin Q, Zhu W. Subtypes and One-Year Survival of First-Ever Stroke in Chinese Patients: The Nanjing Stroke Registry. *Cerebrovasc Dis*. 2006;22(2–3):130–6.
2. Yuan K, Zhu S, Wang H, Chen J, Zhang X, Xu P, et al. Association between malnutrition and long-term mortality in older adults with ischemic stroke. *Clin Nutr*. 2021 May;40(5):2535–42.
3. Wang F, Wang J, Han Y, Shi X, Xu X, Hou C, et al. Triglyceride-glucose index and stroke recurrence in elderly patients with ischemic stroke. *Front Endocrinol*. 2022;13:1005614.
4. Brott T, Adams HP, Olinger CP, Marler JR, Barsan WG, Biller J, et al. Measurements of acute cerebral infarction: a clinical examination scale. *Stroke*. 1989 Jul;20(7):864–70.
5. Adams HP, Bendixen BH, Kappelle LJ, Biller J, Love BB, Gordon DL, et al. Classification of subtype of acute ischemic stroke. Definitions for use in a multicenter clinical trial. TOAST. Trial of Org 10172 in Acute Stroke Treatment. *Stroke*. 1993 Jan;24(1):35–41.
6. Stang A. Critical evaluation of the Newcastle-Ottawa scale for the assessment of the quality of nonrandomized studies in meta-analyses. *Eur J Epidemiol*. 2010 Sep;25(9):603–5.
7. Hamling J, Lee P, Weitkunat R, Ambühl M. Facilitating meta-analyses by deriving relative effect and precision estimates for alternative comparisons from a set of estimates presented by exposure level or disease category. *Stat Med*. 2008 Mar 30;27(7):954–70.
8. Choi YJ, Myung SK, Lee JH. Light Alcohol Drinking and Risk of Cancer: A Meta-Analysis of Cohort Studies. *Cancer Res Treat*. 2018 Apr 15;50(2):474–87.
9. Aune D, Saugstad OD, Henriksen T, Tonstad S. Maternal Body Mass Index and the Risk of Fetal Death, Stillbirth, and Infant Death. *JAMA*. 2014 Apr 16;311(15):1536.
10. Orsini N, Li R, Wolk A, Khudyakov P, Spiegelman D. Meta-Analysis for Linear and Nonlinear Dose-Response Relations: Examples, an Evaluation of Approximations, and Software. *Am J Epidemiol*. 2012 Jan 1;175(1):66–73.
11. Emdin CA, Khera AV, Kathiresan S. Mendelian Randomization. *JAMA*. 2017 Nov 21;318(19):1925.
12. Burgess S, Thompson SG, CRP CHD Genetics Collaboration. Avoiding bias from weak instruments in Mendelian randomization studies. *Int J Epidemiol*. 2011 Jun 1;40(3):755–64.
13. Higgins JPT. Measuring inconsistency in meta-analyses. *BMJ*. 2003 Sep 6;327(7414):557–60.
14. Verbanck M, Chen CY, Neale B, Do R. Detection of widespread horizontal pleiotropy in causal relationships inferred from Mendelian randomization between complex traits and diseases. *Nat Genet*. 2018 May;50(5):693–8.
15. Burgess S, Thompson SG. Interpreting findings from Mendelian randomization using the MR-Egger method. *Eur J Epidemiol*. 2017 May;32(5):377–89.
16. Bowden J, Spiller W, Del Greco M F, Sheehan N, Thompson J, Minelli C, et al. Improving the visualization, interpretation and analysis of two-sample summary data Mendelian randomization via the Radial plot and Radial regression. *Int J Epidemiol*. 2018 Dec 1;47(6):2100–2100.
17. Burgess S, Thompson SG. Multivariable Mendelian Randomization: The Use of Pleiotropic Genetic Variants to Estimate Causal Effects. *Am J Epidemiol*. 2015 Feb 15;181(4):251–60.

### 3. Supplemental Tables

**Table S1 Baseline characteristics between the serum urate assayed and unassayed groups.**

|                                 | Overall                 | Assayed                 | Unassayed               | P value |
|---------------------------------|-------------------------|-------------------------|-------------------------|---------|
| Patients, n                     | 5909                    | 5631                    | 278                     |         |
| <b>Demographics</b>             |                         |                         |                         |         |
| Female, n (%)                   | 1720 (29.1)             | 1628 (28.9)             | 92 (33.1)               | 0.152   |
| Age, y                          | 62.00 (54.00, 70.00)    | 63.00 (54.00, 70.50)    | 60.00 (51.00, 68.00)    | 0.004   |
| <b>Physical examination</b>     |                         |                         |                         |         |
| BMI, kg/m <sup>2</sup>          | 24.61 (22.84, 26.57)    | 24.62 (22.86, 26.61)    | 24.48 (22.60, 26.55)    | 0.591   |
| SBP, mmHg                       | 143.00 (130.00, 158.00) | 143.00 (130.00, 158.00) | 142.00 (130.00, 157.75) | 0.439   |
| DBP, mmHg                       | 80.00 (75.00, 90.00)    | 80.00 (75.00, 90.00)    | 80.00 (73.25, 89.75)    | 0.317   |
| <b>NIHSS score at admission</b> | 4.00 (2.00, 9.00)       | 4.00 (2.00, 9.00)       | 4.00 (1.00, 8.00)       | 0.093   |
| <b>NIHSS at discharge</b>       | 2.00 (0.00, 6.00)       | 2.00 (0.00, 6.00)       | 2.00 (0.00, 5.00)       | 0.385   |
| <b>Laboratory test</b>          |                         |                         |                         |         |
| FBG, mmol/L                     | 5.50 (4.80, 7.30)       | 5.50 (4.80, 7.20)       | 5.80 (4.90, 8.50)       | 0.01    |
| HbA1C                           | 5.90 (5.50, 7.10)       | 5.90 (5.50, 7.00)       | 5.90 (5.40, 7.90)       | 0.458   |
| TG, mmol/L                      | 1.36 (1.00, 1.91)       | 1.35 (1.00, 1.89)       | 1.54 (1.05, 2.32)       | 0.001   |
| TC, mmol/L                      | 4.20 (3.51, 4.95)       | 4.20 (3.50, 4.93)       | 4.36 (3.59, 5.33)       | 0.005   |
| HDL, mmol/L                     | 1.00 (0.85, 1.19)       | 1.00 (0.86, 1.19)       | 1.07 (0.82, 1.33)       | 0.017   |
| LDL, mmol/L                     | 2.51 (1.91, 3.10)       | 2.50 (1.91, 3.08)       | 2.80 (1.99, 3.43)       | 0.002   |
| Hb, g/L                         | 139.00 (127.00, 150.00) | 139.00 (127.00, 150.00) | 139.00 (128.00, 147.00) | 0.957   |
| WBC, 10 <sup>9</sup> /L         | 7.10 (5.80, 8.73)       | 7.10 (5.80, 8.73)       | 7.00 (5.53, 8.70)       | 0.613   |
| PLT, 10 <sup>9</sup> /L         | 200.00 (165.00, 243.00) | 200.00 (164.00, 243.00) | 208.50 (169.25, 248.50) | 0.025   |

|                                    |                      |                      |                      |        |
|------------------------------------|----------------------|----------------------|----------------------|--------|
| Scr, mmol/L                        | 65.00 (55.00, 78.00) | 65.00 (55.00, 77.90) | 69.00 (51.10, 87.00) | 0.135  |
| Fib, g/L                           | 3.10 (2.52, 4.10)    | 3.10 (2.52, 4.10)    | 3.10 (2.46, 4.30)    | 0.731  |
| INR                                | 1.01 (0.96, 1.06)    | 1.01 (0.96, 1.06)    | 1.02 (0.96, 1.08)    | 0.294  |
| <b>Medical history, n (%)</b>      |                      |                      |                      |        |
| Hypertension                       | 3816 (64.6)          | 3646 (64.7)          | 170 (61.2)           | 0.246  |
| Diabetes                           | 1577 (26.7)          | 1513 (26.9)          | 64 (23.0)            | 0.178  |
| Hyperlipidemia                     | 211 (3.6)            | 200 (3.6)            | 11 (4.0)             | 0.85   |
| TIA                                | 20 (0.3)             | 20 (0.4)             | 0 (0.0)              | 0.687  |
| AF                                 | 407 (6.9)            | 393 (7.0)            | 14 (5.0)             | 0.259  |
| Coronary heart disease             | 374 (6.3)            | 354 (6.3)            | 20 (7.2)             | 0.631  |
| MI                                 | 50 (0.8)             | 46 (0.8)             | 4 (1.4)              | 0.441  |
| Hyperbilirubinemia                 | 1199 (20.3)          | 1119 (19.9)          | 80 (28.8)            | <0.001 |
| <b>Behavioral history, n (%)</b>   |                      |                      |                      |        |
| Smoking                            | 2294 (38.8)          | 2191 (38.9)          | 103 (37.1)           | 0.577  |
| Drinking                           | 1388 (23.5)          | 1334 (23.7)          | 54 (19.4)            | 0.118  |
| <b>Family history of stroke</b>    | 191 (3.2)            | 181 (3.2)            | 10 (3.6)             | 0.858  |
| <b>TOAST Types, n(%)</b>           |                      |                      |                      | 0.803  |
| Large-artery atherosclerosis       |                      |                      |                      | 0.393  |
| Cardioembolism                     | 4495 (76.1)          | 4276 (75.9)          | 219 (78.8)           |        |
| Small-vessel occlusion             | 556 (9.4)            | 538 (9.6)            | 18 (6.5)             |        |
| Others                             | 513 (8.7)            | 489 (8.7)            | 24 (8.6)             |        |
| <b>Medication of history, n(%)</b> | 345 (5.8)            | 328 (5.8)            | 17 (6.1)             |        |
| Antiplatelet                       | 5800 (98.2)          | 5527 (98.2)          | 273 (98.2)           | >0.999 |
| Anticoagulation                    | 900 (15.2)           | 866 (15.4)           | 34 (12.2)            | 0.18   |

|                                  |             |             |            |       |
|----------------------------------|-------------|-------------|------------|-------|
| <b>90d mRS, n(%)</b>             |             |             |            | 0.444 |
| 0 (no symptoms)                  | 1267 (21.4) | 1209 (21.5) | 58 (20.9)  |       |
| 1 (no significant disability)    | 2409 (40.8) | 2287 (40.6) | 122 (43.9) |       |
| 2 (slight disability)            | 773 (13.1)  | 737 (13.1)  | 36 (12.9)  |       |
| 3 (moderate disability)          | 650 (11.0)  | 617 (11.0)  | 33 (11.9)  |       |
| 4 (moderately severe disability) | 460 (7.8)   | 446 (7.9)   | 14 (5.0)   |       |
| 5 (severe disability)            | 309 (5.2)   | 294 (5.2)   | 15 (5.4)   |       |
| 6 (dead)                         | 41 (0.7)    | 41 (0.7)    | 0 (0.0)    |       |

---

Continuous variables are described as mean  $\pm$  SD for those with normal distribution and median (IQR) for those with nonnormal distribution.

Abbreviations: Q, quintile; BMI, body mass index; SBP, systolic blood pressure; DBP, diastolic blood pressure; NIHSS, National Institutes of Health Stroke Scale; FBG, fasting blood glucose; HbA1C, glycolated hemoglobin; TG, higher levels of triglyceride; TC, total cholesterol; HDL, high-density lipoprotein; LDL, low-density lipoprotein; Hb, hemoglobin; WBC, white blood cell; PLT, platelet; Scr, serum creatinine; Fib, fibrinogen; INR, international standard ratio; UA, uric acid; TIA, transient ischemic attack; AF, atrial fibrillation; MI, myocardial infarction; TOAST, trial of ORG 10172 in acute stroke treatment; mRS, modified Rankin Scale.



**Table S2 Specific search strategies in Meta-analysis.**

| Search number | Query                                                                                                                                                                             | Results   |
|---------------|-----------------------------------------------------------------------------------------------------------------------------------------------------------------------------------|-----------|
| 11            | #3 and #6 and #9 and #10                                                                                                                                                          | 63        |
| 10            | "cohort studies"[mesh] OR "comparative study"[pt] OR "risk factors"[mesh] OR "cohort"[tw] OR "compared"[tw] OR "groups"[tw] OR "multivariate"[tw]                                 | 9,221,676 |
| 9             | #7 or #8                                                                                                                                                                          | 1,940,319 |
| 8             | Prognoses[Title/Abstract] OR Prognostic Factors[Title/Abstract] OR Prognostic Factor[Title/Abstract] OR Factor, Prognostic[Title/Abstract] OR Factors, Prognostic[Title/Abstract] | 135,922   |
| 7             | "Prognosis"[Mesh]                                                                                                                                                                 | 1,893,487 |
| 6             | #4 or #5                                                                                                                                                                          | 182,390   |

|   |                                                                                                                                                                                                                                                                                                                                                                                                                                                                                                                                                                                                                                                                                                                                                                                                                                                                                                                                                                                                                                                                                                                                                                                                               |         |
|---|---------------------------------------------------------------------------------------------------------------------------------------------------------------------------------------------------------------------------------------------------------------------------------------------------------------------------------------------------------------------------------------------------------------------------------------------------------------------------------------------------------------------------------------------------------------------------------------------------------------------------------------------------------------------------------------------------------------------------------------------------------------------------------------------------------------------------------------------------------------------------------------------------------------------------------------------------------------------------------------------------------------------------------------------------------------------------------------------------------------------------------------------------------------------------------------------------------------|---------|
| 5 | <p>Strokes[Title/Abstract] OR Cerebrovascular Accident[Title/Abstract] OR Cerebrovascular Accidents[Title/Abstract] OR CVA (Cerebrovascular Accident[Title/Abstract]) OR CVAs (Cerebrovascular Accident[Title/Abstract]) OR Cerebrovascular Apoplexy[Title/Abstract] OR Apoplexy, Cerebrovascular[Title/Abstract] OR Vascular Accident, Brain[Title/Abstract] OR Brain Vascular Accident[Title/Abstract] OR Brain Vascular Accidents[Title/Abstract] OR Vascular Accidents, Brain[Title/Abstract] OR Cerebrovascular Stroke[Title/Abstract] OR Cerebrovascular Strokes[Title/Abstract] OR Stroke, Cerebrovascular[Title/Abstract] OR Strokes, Cerebrovascular[Title/Abstract] OR Apoplexy[Title/Abstract] OR Cerebral Stroke[Title/Abstract] OR Cerebral Strokes[Title/Abstract] OR Stroke, Cerebral[Title/Abstract] OR Strokes, Cerebral[Title/Abstract] OR Stroke, Acute[Title/Abstract] OR Acute Stroke[Title/Abstract] OR Acute Strokes[Title/Abstract] OR Strokes, Acute[Title/Abstract] OR Cerebrovascular Accident, Acute[Title/Abstract] OR Acute Cerebrovascular Accident[Title/Abstract] OR Acute Cerebrovascular Accidents[Title/Abstract] OR Cerebrovascular Accidents, Acute[Title/Abstract]</p> | 30,953  |
| 4 | "Stroke"[Mesh]                                                                                                                                                                                                                                                                                                                                                                                                                                                                                                                                                                                                                                                                                                                                                                                                                                                                                                                                                                                                                                                                                                                                                                                                | 168,220 |
| 3 | #1 or #2                                                                                                                                                                                                                                                                                                                                                                                                                                                                                                                                                                                                                                                                                                                                                                                                                                                                                                                                                                                                                                                                                                                                                                                                      | 32,263  |

|   |                                                                                                                                                                                                                                                                                                                                                                                                                                                                                                                                                                                                                                                                                                                                                                                                                                                                                                                                        |        |
|---|----------------------------------------------------------------------------------------------------------------------------------------------------------------------------------------------------------------------------------------------------------------------------------------------------------------------------------------------------------------------------------------------------------------------------------------------------------------------------------------------------------------------------------------------------------------------------------------------------------------------------------------------------------------------------------------------------------------------------------------------------------------------------------------------------------------------------------------------------------------------------------------------------------------------------------------|--------|
| 2 | <p>Acid, Uric[Title/Abstract] OR 2,6,8-Trihydroxypurine[Title/Abstract] OR Trioxopurine[Title/Abstract] OR Potassium Urate[Title/Abstract] OR Urate, Potassium[Title/Abstract] OR Urate[Title/Abstract] OR Ammonium Acid Urate[Title/Abstract] OR Acid Urate, Ammonium[Title/Abstract] OR Urate, Ammonium Acid[Title/Abstract] OR Sodium Urate Monohydrate[Title/Abstract] OR Monohydrate, Sodium Urate[Title/Abstract] OR Urate Monohydrate, Sodium[Title/Abstract] OR Monosodium Urate Monohydrate[Title/Abstract] OR Monohydrate, Monosodium Urate[Title/Abstract] OR Urate Monohydrate, Monosodium[Title/Abstract] OR Sodium Acid Urate Monohydrate[Title/Abstract] OR Sodium Urate[Title/Abstract] OR Urate, Sodium[Title/Abstract] OR Monosodium Urate[Title/Abstract] OR Urate, Monosodium[Title/Abstract] OR Sodium Acid Urate[Title/Abstract] OR Acid Urate, Sodium[Title/Abstract] OR Urate, Sodium Acid[Title/Abstract]</p> | 9,763  |
| 1 | "Uric Acid"[Mesh]                                                                                                                                                                                                                                                                                                                                                                                                                                                                                                                                                                                                                                                                                                                                                                                                                                                                                                                      | 27,748 |

---

**Table S3. Details of the GWASes included in the Mendelian randomization.**

| Traits             | Consortium        | Sample size | Ancestry               | PubMed ID |
|--------------------|-------------------|-------------|------------------------|-----------|
| Uric acid          | CKDGen            | 288649      | European               | 31578528  |
| Functional outcome | GISCOME           | 6021        | European               | 30796134  |
| CKD                | CKDGen            | 118147      | European               | 26831199  |
| BMI                | GIANT             | 322154      | European               | 25673413  |
| CAD                | CARDIoGRAMplusC4D | 184305      | Predominantly European | 26343387  |
| T2D                | DIAGRAM           | 898130      | European               | 30297969  |
| Gout               | GUGC              | 69374       | European               | 23263486  |
| Ischemic stroke    | GIGASTROKE        | 1308460     | European               | 36180795  |

Abbreviations: GISCOME, Genetics of Ischemic Stroke Functional Outcome network. DIAGRAM, Diabetes Genetics Replication And Meta-analysis. GIANT, The Genetic Investigation of Anthropometric Traits. CARDIoGRAMplusC4D, Coronary Artery Disease Genome wide Replication and Meta-analysis plus The Coronary Artery Disease Genetics. GUGC, Global Urate Genetics Consortium. CKD, chronic kidney disease. BMI, body mass index. CAD, coronary artery disease. T2D, type 2 diabetes.

**Table S4. Baseline characteristics and clinical information of participants.**

|                                 | Overall              | Q1(≤234 μmol/L)      | Q2(≤297 μmol/L)      | Q3(≤366 μmol/L)      | Q4(>366 μmol/L)      | P value |
|---------------------------------|----------------------|----------------------|----------------------|----------------------|----------------------|---------|
| Patients, n                     | 5631                 | 1423                 | 1398                 | 1421                 | 1389                 |         |
| <b>Demographics</b>             |                      |                      |                      |                      |                      |         |
| Female, n (%)                   | 1628 (28.9)          | 668 (46.9)           | 446 (31.9)           | 314 (22.1)           | 200 (14.4)           | <0.001  |
| Age, y                          | 63.0 (54.0, 70.5)    | 64.0 (56.0, 72.0)    | 63.0 (54.0, 70.0)    | 62.0 (54.0, 70.0)    | 61.0 (51.0, 70.0)    | <0.001  |
| Recruitment year, y             | 2017 (2015, 2020)    | 2017 (2015, 2019)    | 2017 (2015, 2020)    | 2017 (2015, 2020)    | 2018 (2016, 2021)    | 0.001   |
| <b>Physical examination</b>     |                      |                      |                      |                      |                      |         |
| BMI, kg/m <sup>2</sup>          | 24.6 (22.9, 26.6)    | 24.0 (22.0, 25.3)    | 24.5 (22.9, 26.4)    | 24.7 (22.9, 26.6)    | 25.4 (23.7, 27.3)    | <0.001  |
| SBP, mmHg                       | 143.0 (130.0, 158.0) | 142.0 (130.0, 157.0) | 143.0 (130.0, 158.0) | 143.0 (130.0, 158.0) | 143.0 (130.0, 159.0) | 0.673   |
| DBP, mmHg                       | 80.0 (75.0, 90.0)    | 80.0 (74.0, 89.0)    | 80.0 (75.0, 90.0)    | 80.0 (75.0, 90.0)    | 82.0 (75.0, 92.0)    | <0.001  |
| <b>NIHSS score at admission</b> | 4.0 (2.0, 9.0)       | 6.0 (3.0, 13.0)      | 4.0 (2.0, 9.0)       | 3.0 (1.0, 7.0)       | 3.0 (1.0, 7.0)       | <0.001  |
| <b>NIHSS at discharge</b>       | 2.0 (0.0, 6.0)       | 4.0 (1.0, 10.0)      | 2.0 (0.0, 6.0)       | 1.0 (0.0, 4.0)       | 1.0 (0.0, 4.0)       | <0.001  |
| <b>Laboratory test</b>          |                      |                      |                      |                      |                      |         |
| FBG, mmol/L                     | 5.5 (4.8, 7.2)       | 6.2 (5.0, 8.5)       | 5.5 (4.8, 7.1)       | 5.4 (4.7, 6.7)       | 5.3 (4.6, 6.6)       | <0.001  |
| HbA1C                           | 5.9 (5.5, 7.0)       | 6.1 (5.5, 7.8)       | 5.9 (5.5, 7.1)       | 5.9 (5.5, 6.9)       | 5.8 (5.5, 6.6)       | <0.001  |
| TG, mmol/L                      | 1.4 (1.0, 1.9)       | 1.2 (0.9, 1.6)       | 1.3 (1.0, 1.8)       | 1.4 (1.0, 1.9)       | 1.6 (1.2, 2.3)       | <0.001  |
| TC, mmol/L                      | 4.2 (3.5, 4.9)       | 4.1 (3.4, 4.8)       | 4.1 (3.4, 4.8)       | 4.2 (3.5, 5.0)       | 4.3 (3.6, 5.1)       | <0.001  |
| HDL, mmol/L                     | 1.0 (0.9, 1.2)       | 1.1 (0.9, 1.3)       | 1.0 (0.9, 1.2)       | 1.0 (0.9, 1.2)       | 0.9 (0.8, 1.1)       | <0.001  |
| LDL, mmol/L                     | 2.5 (1.9, 3.1)       | 2.4 (1.9, 3.0)       | 2.5 (1.9, 3.0)       | 2.5 (1.9, 3.1)       | 2.6(2.0, 3.2)        | <0.001  |
| Hb, g/L                         | 139.0 (127.0, 150.0) | 132.0 (121.5, 143.0) | 139.0 (127.0, 149.0) | 141.0 (131.0, 152.0) | 143.0 (131.0, 154.0) | <0.001  |
| WBC, 10 <sup>9</sup> /L         | 7.1 (5.8, 8.7)       | 7.4 (5.8, 9.3)       | 6.9 (5.7, 8.6)       | 6.9 (5.8, 8.4)       | 7.2 (6.0, 8.9)       | <0.001  |
| PLT, 10 <sup>9</sup> /L         | 200.0 (164.0, 243.0) | 201.0 (163.5, 247.0) | 199.0 (165.0, 242.0) | 198.0 (162.0, 238.0) | 202.0 (165.0, 245.0) | 0.225   |
| Scr, mmol/L                     | 65.0 (55.0, 77.9)    | 56.0 (47.0, 65.0)    | 62.0 (54.0, 72.0)    | 68.6 (58.1, 79.0)    | 77.0 (66.0, 95.0)    | <0.001  |
| Fib, g/L                        | 3.1 (2.5, 4.1)       | 3.3 (2.6, 4.2)       | 3.1 (2.5, 4.0)       | 3.0 (2.5, 3.9)       | 3.1 (2.5, 4.0)       | <0.001  |
| INR                             | 1.0 (1.0, 1.1)       | 1.0 (1.0, 1.1)       | 1.0 (1.0, 1.1)       | 1.0 (1.0, 1.1)       | 1.0 (1.0, 1.1)       | 0.028   |

|                                     |                      |                      |                      |                      |                      |        |
|-------------------------------------|----------------------|----------------------|----------------------|----------------------|----------------------|--------|
| UA, $\mu\text{mol/L}$               | 296.0 (234.0, 366.0) | 194.0 (167.0, 217.0) | 266.0 (252.0, 281.0) | 328.0 (313.0, 345.0) | 419.0 (388.0, 465.0) | <0.001 |
| <b>Medical history, n (%)</b>       |                      |                      |                      |                      |                      |        |
| Hypertension                        | 3646 (64.7)          | 858 (60.3)           | 888 (63.5)           | 924 (65.0)           | 976 (70.3)           | <0.001 |
| Diabetes                            | 1513 (26.9)          | 453 (31.8)           | 385 (27.5)           | 368 (25.9)           | 307 (22.1)           | <0.001 |
| Hyperlipidemia                      | 200 (3.6)            | 44 (3.1)             | 49 (3.5)             | 43 (3.0)             | 64 (4.6)             | 0.088  |
| TIA                                 | 20 (0.4)             | 10 (0.7)             | 4 (0.3)              | 5 (0.4)              | 1 (0.1)              | 0.042  |
| AF                                  | 393 (7.0)            | 114 (8.0)            | 90 (6.4)             | 80 (5.6)             | 109 (7.8)            | 0.036  |
| Coronary heart disease              | 354 (6.3)            | 94 (6.6)             | 86 (6.2)             | 73 (5.1)             | 101 (7.3)            | 0.124  |
| MI                                  | 46 (0.8)             | 8 (0.6)              | 15 (1.1)             | 6 (0.4)              | 17 (1.2)             | 0.049  |
| Hyperbilirubinemia                  | 1119 (19.9)          | 248 (17.4)           | 292 (20.9)           | 287 (20.2)           | 292 (21.0)           | 0.058  |
| <b>Behavioral history, n (%)</b>    |                      |                      |                      |                      |                      |        |
| Smoking                             | 2191 (38.9)          | 398 (28.0)           | 509 (36.4)           | 617 (43.4)           | 667 (48.0)           | <0.001 |
| Drinking                            | 1334 (23.7)          | 232 (16.3)           | 329 (23.5)           | 377 (26.5)           | 396 (28.5)           | <0.001 |
| <b>Family history of stroke</b>     | 181 (3.2)            | 37 (2.6)             | 50 (3.6)             | 52 (3.7)             | 42 (3.0)             | 0.336  |
| <b>TOAST Types, n (%)</b>           |                      |                      |                      |                      |                      |        |
| Large-artery atherosclerosis        | 4276 (75.9)          | 1085 (76.2)          | 1092 (78.1)          | 1088 (76.6)          | 1011 (72.8)          | 0.002  |
| Cardioembolism                      | 538 (9.6)            | 143 (10.0)           | 124 (8.9)            | 129 (9.1)            | 142 (10.2)           |        |
| Small-vessel occlusion              | 489 (8.7)            | 102 (7.2)            | 118 (8.4)            | 137 (9.6)            | 132 (9.5)            |        |
| Others                              | 328 (5.8)            | 93 (6.5)             | 64 (4.6)             | 67 (4.7)             | 104 (7.5)            |        |
| <b>Medication of history, n (%)</b> |                      |                      |                      |                      |                      |        |
| Antiplatelet                        | 5527 (98.2)          | 1397 (98.2)          | 1374 (98.3)          | 1397 (98.3)          | 1359 (97.8)          | 0.782  |
| Anticoagulation                     | 866 (15.4)           | 250 (17.6)           | 227 (16.2)           | 190 (13.4)           | 199 (14.3)           | 0.009  |
| <b>90d mRS, n (%)</b>               |                      |                      |                      |                      |                      |        |
| 0 (no symptoms)                     | 1209 (21.5)          | 206 (14.5)           | 293 (21.0)           | 327 (23.0)           | 383 (27.6)           | <0.001 |
| 1 (no significant disability)       | 2287 (40.6)          | 485 (34.1)           | 598 (42.8)           | 632 (44.5)           | 572 (41.2)           |        |
| 2 (slight disability)               | 737 (13.1)           | 202 (14.2)           | 189 (13.5)           | 180 (12.7)           | 166 (12.0)           |        |

|                                  |            |            |            |           |           |
|----------------------------------|------------|------------|------------|-----------|-----------|
| 3 (moderate disability)          | 617 (11.0) | 222 (15.6) | 144 (10.3) | 140 (9.9) | 111 (8.0) |
| 4 (moderately severe disability) | 446 (7.9)  | 170 (11.9) | 112 (8.0)  | 79 (5.6)  | 85 (6.1)  |
| 5 (severe disability)            | 294 (5.2)  | 123 (8.6)  | 54 (3.9)   | 52 (3.7)  | 65 (4.7)  |
| 6 (dead)                         | 41 (0.7)   | 15 (1.1)   | 8 (0.6)    | 11 (0.8)  | 7 (0.5)   |

---

Continuous variables are described as mean  $\pm$  SD for those with normal distribution and median (IQR) for those with nonnormal distribution.

Abbreviations: Q, quintile; BMI, body mass index; SBP, systolic blood pressure; DBP, diastolic blood pressure; NIHSS, National Institutes of Health Stroke Scale; FBG, fasting blood glucose; HbA1C, glycolated hemoglobin; TG, higher levels of triglyceride; TC, total cholesterol; HDL, high-density lipoprotein; LDL, low-density lipoprotein; Hb, hemoglobin; WBC, white blood cell; PLT, platelet; Scr, serum creatinine; Fib, fibrinogen; INR, international standard ratio; UA, uric acid; TIA, transient ischemic attack; AF, atrial fibrillation; MI, myocardial infarction; TOAST, trial of ORG 10172 in acute stroke treatment; mRS, modified Rankin Scale.

**Table S5. Subgroup analysis of odds ratio (95%CI) of primary outcome according to UA quintile.**

| Subgroup                        | Outcomes/patients | Q1               | Q2               | P value | Q3               | P value | Q4               | P value | P <sub>interaction</sub> |
|---------------------------------|-------------------|------------------|------------------|---------|------------------|---------|------------------|---------|--------------------------|
| <b>Age, y</b>                   |                   |                  |                  |         |                  |         |                  |         |                          |
| ≤60                             | 441/2468          | 1.00 (reference) | 0.78 (0.52-1.15) | 0.211   | 0.90 (0.6-1.34)  | 0.594   | 0.69 (0.44-1.08) | 0.101   | 0.894                    |
| >60                             | 957/3163          | 1.00 (reference) | 0.84 (0.64-1.09) | 0.191   | 0.92 (0.69-1.22) | 0.564   | 0.93 (0.68-1.28) | 0.667   |                          |
| <b>Sex</b>                      |                   |                  |                  |         |                  |         |                  |         |                          |
| Men                             | 894/4003          | 1.00 (reference) | 0.82 (0.62-1.09) | 0.168   | 0.90 (0.68-1.20) | 0.486   | 0.78 (0.57-1.07) | 0.127   | 0.776                    |
| Women                           | 504/1628          | 1.00 (reference) | 0.80 (0.56-1.14) | 0.223   | 0.86 (0.56-1.29) | 0.459   | 0.99 (0.61-1.61) | 0.975   |                          |
| <b>BMI, kg/m<sup>2</sup></b>    |                   |                  |                  |         |                  |         |                  |         |                          |
| ≤24                             | 596/2238          | 1.00 (reference) | 0.73 (0.53-1.00) | 0.052   | 0.90 (0.64-1.27) | 0.540   | 0.84 (0.56-1.26) | 0.407   | 0.198                    |
| >24                             | 802/3393          | 1.00 (reference) | 0.90 (0.66-1.22) | 0.507   | 0.89 (0.65-1.22) | 0.470   | 0.83 (0.59-1.16) | 0.275   |                          |
| <b>NIHSS score at admission</b> |                   |                  |                  |         |                  |         |                  |         |                          |
| ≤4                              | 1234/3050         | 1.00 (reference) | 0.83 (0.53-1.28) | 0.394   | 0.92 (0.59-1.45) | 0.728   | 0.83 (0.50-1.35) | 0.446   | 0.007                    |
| >4                              | 1172/2633         | 1.00 (reference) | 0.83 (0.64-1.06) | 0.138   | 0.92 (0.70-1.21) | 0.550   | 0.86 (0.64-1.17) | 0.343   |                          |
| <b>History of hypertension</b>  |                   |                  |                  |         |                  |         |                  |         |                          |
| No                              | 442/1985          | 1.00 (reference) | 0.73 (0.49-1.07) | 0.112   | 0.72 (0.47-1.10) | 0.133   | 0.85 (0.52-1.38) | 0.518   | 0.240                    |
| Yes                             | 956/3646          | 1.00 (reference) | 0.88 (0.67-1.15) | 0.333   | 1.01 (0.76-1.34) | 0.943   | 0.84 (0.62-1.14) | 0.258   |                          |
| <b>History of diabetes</b>      |                   |                  |                  |         |                  |         |                  |         |                          |
| No                              | 985/4118          | 1.00 (reference) | 0.73 (0.56-0.96) | 0.022   | 0.81 (0.61-1.07) | 0.130   | 0.77 (0.56-1.05) | 0.093   | 0.333                    |
| Yes                             | 413/1513          | 1.00 (reference) | 1.09 (0.73-1.62) | 0.672   | 1.13 (0.74-1.73) | 0.565   | 0.99 (0.6-1.61)  | 0.954   |                          |
| <b>Smoking</b>                  |                   |                  |                  |         |                  |         |                  |         |                          |
| No                              | 930/3440          | 1.00 (reference) | 0.83 (0.64-1.08) | 0.165   | 0.99 (0.74-1.32) | 0.956   | 1.00 (0.72-1.38) | 0.998   | 0.600                    |
| Yes                             | 468/2191          | 1.00 (reference) | 0.77 (0.52-1.16) | 0.211   | 0.76 (0.51-1.15) | 0.195   | 0.59 (0.38-0.91) | 0.018   |                          |
| <b>Drinking</b>                 |                   |                  |                  |         |                  |         |                  |         |                          |
| No                              | 1120/4297         | 1.00 (reference) | 0.86 (0.67-1.09) | 0.214   | 0.95 (0.73-1.23) | 0.711   | 0.92 (0.69-1.23) | 0.577   | 0.570                    |
| Yes                             | 278/1334          | 1.00 (reference) | 0.62 (0.37-1.05) | 0.076   | 0.68 (0.40-1.16) | 0.158   | 0.55 (0.30-0.99) | 0.046   |                          |



ORs and 95% CIs was calculated with the use of the logistic regression model. Q1 level ( $\leq 234 \mu\text{mol/L}$ ) of uric acid was set as the reference.

Abbreviations: Q, quintile; OR, odd ratio; CI, confidence interval; BMI, body mass index; NIHSS, National Institutes of Health Stroke Scale.

Analyses were adjusted for adjusted for sex, age, recruitment year, BMI, NIHSS Score at admission, hypertension, systolic blood pressure, diastolic blood pressure, diabetes, fasting blood glucose, glycolated hemoglobin, hyperlipidemia, higher levels of triglyceride, high-density lipoprotein, history of transient ischemic attack, smoking, drinking, family history of stroke, history of atrial fibrillation, history of coronary heart disease, history of myocardial infarction, hemoglobin, white blood cell, platelet, hyperbilirubinemia, serum creatinine, fibrinogen, international standard ratio, TOAST type, antiplatelet treatment, anti-coagulation treatment and NIHSS at discharge when they were not the strata variables.

$P_{\text{interaction}}$ : Test for interaction between UA quintile and prespecified factors on primary outcome.

**Table S6 Baseline characteristics and clinical information of participants after performing PSM (Propensity Score Matching).**

|                                 | Overall                 | Good outcome            | Poor outcome            | P value |
|---------------------------------|-------------------------|-------------------------|-------------------------|---------|
| Patients, n                     | 1616                    | 808                     | 808                     |         |
| <b>Demographics</b>             |                         |                         |                         |         |
| Female, n (%)                   | 559 (34.6)              | 286 (35.4)              | 273 (33.8)              | 0.530   |
| Age, y                          | 66.00 (57.00, 73.00)    | 66.00 (57.75, 74.00)    | 65.00 (56.00, 73.00)    | 0.122   |
| Recruitment year, y             | 2017 (2015, 2020)       | 2017.00 (2015, 2020)    | 2017 (2015, 2020)       | 0.957   |
| <b>Physical examination</b>     |                         |                         |                         |         |
| BMI, kg/m <sup>2</sup>          | 24.27 (22.60, 26.30)    | 24.36 (22.49, 26.35)    | 24.22 (22.71, 26.24)    | 0.886   |
| SBP, mmHg                       | 144.00 (132.00, 160.00) | 144.00 (131.00, 160.00) | 144.00 (132.00, 159.25) | 0.627   |
| DBP, mmHg                       | 80.00 (75.00, 90.00)    | 80.00 (75.00, 90.00)    | 80.00 (74.75, 90.00)    | 0.565   |
| <b>NIHSS score at admission</b> | 8.00 (4.00, 12.00)      | 8.00 (4.00, 12.00)      | 8.00 (4.00, 12.00)      | 0.275   |
| <b>NIHSS at discharge</b>       | 5.00 (2.00, 9.00)       | 5.00 (2.00, 8.00)       | 6.00 (3.00, 9.00)       | 0.019   |
| <b>Laboratory test</b>          |                         |                         |                         |         |
| FBG, mmol/L                     | 5.80 (4.90, 7.80)       | 5.80 (4.90, 7.60)       | 5.90 (4.90, 7.93)       | 0.252   |
| HbA1C                           | 6.00 (5.50, 7.30)       | 6.00 (5.50, 7.20)       | 6.00 (5.50, 7.43)       | 0.837   |
| TG, mmol/L                      | 1.29 (0.95, 1.75)       | 1.29 (0.92, 1.74)       | 1.29 (0.97, 1.75)       | 0.395   |
| TC, mmol/L                      | 4.14 (3.45, 4.90)       | 4.14 (3.44, 4.90)       | 4.13 (3.47, 4.92)       | 0.901   |
| HDL, mmol/L                     | 1.01 (0.85, 1.19)       | 1.01 (0.85, 1.18)       | 1.01 (0.85, 1.20)       | 0.857   |
| LDL, mmol/L                     | 2.50 (1.91, 3.12)       | 2.52 (1.92, 3.13)       | 2.45 (1.91, 3.08)       | 0.214   |
| Hb, g/L                         | 136.00 (124.00, 146.00) | 135.00 (123.00, 147.00) | 137.00 (125.00, 146.00) | 0.174   |
| WBC, 10 <sup>9</sup> /L         | 7.40 (6.00, 9.27)       | 7.40 (6.00, 9.40)       | 7.40 (6.03, 9.10)       | 0.995   |
| PLT, 10 <sup>9</sup> /L         | 200.00 (161.00, 245.00) | 200.00 (159.00, 243.00) | 200.00 (165.00, 247.00) | 0.237   |

|                                    |                         |                         |                         |        |
|------------------------------------|-------------------------|-------------------------|-------------------------|--------|
| Scr, mmol/L                        | 63.00 (53.00, 76.00)    | 63.00 (53.00, 77.00)    | 63.00 (52.40, 76.00)    | 0.667  |
| Fib, g/L                           | 3.29 (2.62, 4.34)       | 3.26 (2.64, 4.36)       | 3.30 (2.61, 4.33)       | 0.908  |
| INR                                | 1.02 (0.97, 1.07)       | 1.02 (0.97, 1.08)       | 1.02 (0.97, 1.07)       | 0.753  |
| UA, $\mu$ mol/L                    | 276.50 (218.00, 344.00) | 279.50 (221.00, 349.00) | 273.50 (214.00, 339.00) | 0.221  |
| <b>Medical history, n (%)</b>      |                         |                         |                         |        |
| Hypertension                       | 1106 (68.4)             | 561 (69.4)              | 545 (67.5)              | 0.422  |
| Diabetes                           | 495 (30.6)              | 249 (30.8)              | 246 (30.4)              | 0.914  |
| Hyperlipidemia                     | 48 (3.0)                | 22 (2.7)                | 26 (3.2)                | 0.660  |
| TIA                                | 6 (0.4)                 | 3 (0.4)                 | 3 (0.4)                 | >0.999 |
| AF                                 | 142 (8.8)               | 66 (8.2)                | 76 (9.4)                | 0.429  |
| Coronary heart disease             | 118 (7.3)               | 56 (6.9)                | 62 (7.7)                | 0.633  |
| MI                                 | 25 (1.5)                | 13 (1.6)                | 12 (1.5)                | >0.999 |
| Hyperbilirubinemia                 | 350 (21.7)              | 177 (21.9)              | 173 (21.4)              | 0.856  |
| <b>Behavioral history, n (%)</b>   |                         |                         |                         |        |
| Smoking                            | 549 (34.0)              | 258 (31.9)              | 291 (36.0)              | 0.093  |
| Drinking                           | 347 (21.5)              | 171 (21.2)              | 176 (21.8)              | 0.809  |
| <b>Family history of stroke</b>    | 32 (2.0)                | 14 (1.7)                | 18 (2.2)                | 0.592  |
| <b>TOAST Types, n(%)</b>           |                         |                         |                         |        |
| Large-artery atherosclerosis       | 1233 (76.3)             | 623 (77.1)              | 610 (75.5)              | 0.796  |
| Cardioembolism                     | 194 (12.0)              | 92 (11.4)               | 102 (12.6)              |        |
| Small-vessel occlusion             | 114 (7.1)               | 58 (7.2)                | 56 (6.9)                |        |
| Others                             | 75 (4.6)                | 35 (4.3)                | 40 (5.0)                |        |
| <b>Medication of history, n(%)</b> |                         |                         |                         |        |
| Antiplatelet                       | 1579 (97.7)             | 788 (97.5)              | 791 (97.9)              | 0.739  |

Anticoagulation

310 (19.2)

160 (19.8)

150 (18.6)

0.570

---

Continuous variables are described as mean  $\pm$  SD for those with normal distribution and median (IQR) for those with nonnormal distribution.

Abbreviations: Q, quintile; BMI, body mass index; SBP, systolic blood pressure; DBP, diastolic blood pressure; NIHSS, National Institutes of Health Stroke Scale; FBG, fasting blood glucose; HbA1C, glycolated hemoglobin; TG, higher levels of triglyceride; TC, total cholesterol; HDL, high-density lipoprotein; LDL, low-density lipoprotein; Hb, hemoglobin; WBC, white blood cell; PLT, platelet; Scr, serum creatinine; Fib, fibrinogen; INR, international standard ratio; UA, uric acid; TIA, transient ischemic attack; AF, atrial fibrillation; MI, myocardial infarction; TOAST, trial of ORG 10172 in acute stroke treatment; mRS, modified Rankin Scale.

**Table S7. Characteristics of included cohort studies in meta-analysis.**

| Author  | Year | Study design | Country | Sample | Male (%) | Age   | Basline urate (μmol/L) | UA measurement time                   | Follow Up Duration |
|---------|------|--------------|---------|--------|----------|-------|------------------------|---------------------------------------|--------------------|
| Dawson  | 2009 | cohort       | Britain | 852    | 61.5     | 68    | 350                    | within 6 h of stroke onset            | 3m                 |
| Miedema | 2012 | cohort       | Holland | 226    | 54.4     | 71    | 320                    | within 6 h of stroke onset            | 3m                 |
| Wu      | 2014 | cohort       | China   | 1452   | 64.7     | 63    | 303                    | on the morning after admission        | 12m                |
| Chen    | 2016 | cohort       | China   | 3284   | 63.6     | 62.6  | ≥365                   | within 24 hours of hospital admission | 3m                 |
| Zhang   | 2016 | cohort       | China   | 303    | 66.3     | 64.6  | >402                   | within 24 hours of hospital admission | 3m                 |
| Mapoure | 2018 | cohort       | Afirca  | 480    | 53.1     | 62.8  | 423                    | on the morning after admission        | 3m                 |
| Yang    | 2018 | cohort       | China   | 752    | 52.8     | 59    | 255                    | within 24 hours of hospital admission | 3m                 |
| Wang    | 2019 | cohort       | China   | 1041   | 64.8     | 63.93 | 341.70                 | on the morning after admission        | 12m                |
| Liu     | 2022 | cohort       | China   | 636    | 57.1     | 70.6  | >368.9                 | at the time of admission              | 3m                 |
| Zhong   | 2023 | cohort       | China   | 5631   | 71.1     | 63    | >366                   | within 24 hours of hospital admission | 3m                 |

Continued.

| Author  | Year | Definition of Good Outcome | Definition of Bad Outcome | Covariance                                                                                                                                                      | Quality Assessment <sup>a</sup> |
|---------|------|----------------------------|---------------------------|-----------------------------------------------------------------------------------------------------------------------------------------------------------------|---------------------------------|
| Dawson  | 2009 | 90 d mRS ≤ 2               | 90 d mRS ≥ 3              | Age, Male, BSSS, Creatinine, SBP, Glucose, Hypertension, AF, CHF.                                                                                               | 8                               |
| Miedema | 2012 | 90 d mRS ≤ 2               | 90 d mRS ≥ 3              | age, baseline NIHSS, serum glucose level, sex, history of coronary artery disease, history of previous stroke and large vessel disease as stroke aetiology.     | 8                               |
| Wu      | 2014 | 90 d mRS ≤ 2               | 90 d mRS ≥ 3              | age, NIHSS at admission, hemoglobin at admission, fasting glucose, HbA1C, SBP, DBP, triglyceride, HDL, LDL, creatinine, CHOL, BMI, ASPECT, homocysteine, hs-CRP | 8                               |

|         |      |                   |                   |                                                                                                                                                                                                                                                                                                                                                   |   |
|---------|------|-------------------|-------------------|---------------------------------------------------------------------------------------------------------------------------------------------------------------------------------------------------------------------------------------------------------------------------------------------------------------------------------------------------|---|
| Chen    | 2016 | 90 d mRS $\leq$ 2 | 90 d mRS $\geq$ 3 | adjusted for age, time from onset to hospitalization, current smoking, alcohol consumption, glucose, SBP, WBC, dyslipidemia, history of hypertension, history of coronary heart disease, history of diabetes mellitus, family history of stroke, and current use of antihypertensive medications, baseline NIHSS                                  | 7 |
| Zhang   | 2016 | 90 d mRS $\leq$ 1 | 90 d mRS $\geq$ 2 | Age, AF, hypertension, smokers, CAD, previous stroke, hyperlipidemia, ASCO, baseline NIHSS scores, thrombolysis treatment, drugs, GFR                                                                                                                                                                                                             | 8 |
| Mapoure | 2018 | 90 d mRS $\leq$ 2 | 90 d mRS $\geq$ 3 | Age, hyperension, smoking, previous stroke, NIHSS, hyperglycemia, hyperuremia, hypercreatinemia, HDL, complications                                                                                                                                                                                                                               | 6 |
| Yang    | 2018 | 90 d mRS $\leq$ 2 | 90 d mRS $\geq$ 3 | age, NIHSS, lesion volumes, AF, smoking history, hypertension, stroke syndrome, stroke etiology, Hs-CRP, FBG, HCY.                                                                                                                                                                                                                                | 9 |
| Wang    | 2019 | 90 d mRS $\leq$ 2 | 90 d mRS $\geq$ 3 | age, sex, tobacco use, alcohol abuse, hypertension, hyperlipidaemia, hyperuricemia, atrial fibrillation, coronary heart disease, heart failure, myocardial infarction, other heart diseases, previous stroke, serum TC, TG, LDL, HDL, stroke subtypes and NIHSS at admission.                                                                     | 7 |
| Liu     | 2022 | 90 d mRS $\leq$ 1 | 90 d mRS $\geq$ 2 | Age, sex, BMI, SBP, DBP, OSAS, smoking, drinking, TG, TC, HDL-C, LDL-C, Hcy, eGFR, and ESR, and NIHSS score on admission.                                                                                                                                                                                                                         | 5 |
| Zhong   | 2023 | 90 d mRS $\leq$ 2 | 90 d mRS $\geq$ 3 | Sex, Age, BMI, NIHSS Score, Hypertension, SBP, DBP, Diabetes, FBG, HbA1C, Hyperlipidemia, TG, HDL, History of TIA, Smoking, Drinking, Family history of stroke, History of AF, History of CHD, History of MI, History of stroke, Hb, WBC, PLT, HBI, Scr, FIB, INR, TOAST, Anti platelet treatment, Anti coagulation treatment, NIHSS at discharge | 9 |

<sup>a</sup> The quality assessment score was determined according to the Newcastle-Ottawa Scale for cohort studies (0-9 points).

Abbreviations: mRS, modified Rankin Scale; BMI, body mass index; SBP, systolic blood pressure; DBP, diastolic blood pressure; NIHSS, National Institutes of Health Stroke Scale; FBG, fasting blood glucose; HbA1C, glycolated hemoglobin; TG, higher levels of triglyceride; TC, total cholesterol; HDL, high-density lipoprotein; LDL, low-density lipoprotein; Hb, hemoglobin; WBC, white blood cell; PLT, platelet; Scr, serum creatinine; Fib, fibrinogen; INR, international standard ratio; UA, uric acid; TIA, transient ischemic attack; AF, atrial fibrillation; MI, myocardial infarction; TOAST, trial of ORG 10172 in acute stroke treatment; CHF, chronic heart failure; CHOL, cholesterol; ASPECT, Alberta Stroke Programme early CT score; ASCO, A means atherosclerosis, S means small vessel disease, C means cardiac sources, O means other causes; GFR, glomerular filtration rate; hs-CRP, high sensitivity C-reactive protein; HCY, homocysteine.

**Table S8 Genome-wide significant ( $p < 5 \times 10^{-8}$ ) single nucleotide polymorphisms that were used as instruments for serum urate level.**

| SNP         | Chr | Pos       | Effect Allele | Other Allele | EAF  | Nearest gene        | Beta   | Se    | P-value  | F-statistics |
|-------------|-----|-----------|---------------|--------------|------|---------------------|--------|-------|----------|--------------|
| rs2480712   | 1   | 2156999   | C             | G            | 0.66 | <i>SKI</i>          | 0.024  | 0.004 | 6.25E-09 | 33.76        |
| rs4646068   | 1   | 15828704  | T             | C            | 0.69 | <i>CASP9</i>        | 0.024  | 0.004 | 7.71E-09 | 33.35        |
| rs79598313  | 1   | 27284913  | T             | C            | 0.03 | <i>KDF1</i>         | 0.100  | 0.013 | 9.22E-15 | 60.06        |
| rs141990161 | 1   | 119943525 | T             | C            | 0.98 | <i>HAO2</i>         | 0.133  | 0.023 | 1.59E-08 | 31.94        |
| rs10910845  | 1   | 145723120 | A             | C            | 0.47 | <i>NBPF20</i>       | 0.058  | 0.004 | 1.50E-51 | 228.16       |
| rs11204701  | 1   | 150662179 | A             | T            | 0.78 | <i>GOLPH3L</i>      | -0.036 | 0.005 | 1.04E-14 | 59.81        |
| rs2070803   | 1   | 155157715 | A             | G            | 0.58 | <i>TRIM46</i>       | 0.053  | 0.004 | 4.09E-41 | 180.34       |
| rs2760215   | 1   | 163675883 | T             | C            | 0.50 | <i>LOC100422212</i> | -0.025 | 0.004 | 5.81E-11 | 42.88        |
| rs12037861  | 1   | 221038177 | A             | T            | 0.70 | <i>HLX-AS1</i>      | 0.023  | 0.004 | 3.39E-08 | 30.47        |
| rs2867112   | 2   | 651349    | T             | G            | 0.83 | <i>TMEM18</i>       | 0.035  | 0.005 | 9.84E-12 | 46.36        |
| rs72782806  | 2   | 15788511  | A             | G            | 0.26 | <i>DDX1</i>         | 0.025  | 0.004 | 8.12E-09 | 33.24        |
| rs1260326   | 2   | 27730940  | T             | C            | 0.40 | <i>GCKR</i>         | 0.070  | 0.004 | 4.61E-69 | 308.52       |
| rs12472381  | 2   | 59321225  | A             | G            | 0.39 | <i>LINC01122</i>    | 0.022  | 0.004 | 1.80E-08 | 31.70        |
| rs12987661  | 2   | 69813458  | T             | C            | 0.87 | <i>AAK1</i>         | 0.041  | 0.006 | 1.44E-12 | 50.13        |
| rs17050272  | 2   | 121306440 | A             | G            | 0.42 | <i>LINC01101</i>    | 0.032  | 0.004 | 1.57E-15 | 63.54        |
| rs11683692  | 2   | 145509615 | T             | C            | 0.94 | <i>TEX41</i>        | -0.048 | 0.008 | 1.32E-08 | 32.30        |
| rs1234413   | 2   | 148844369 | T             | C            | 0.44 | <i>MBD5</i>         | -0.022 | 0.004 | 7.08E-09 | 33.51        |
| rs9287911   | 2   | 170037294 | A             | T            | 0.25 | <i>LRP2</i>         | 0.038  | 0.004 | 1.13E-17 | 73.28        |
| rs187355703 | 2   | 176993583 | C             | G            | 0.97 | <i>HOXD8</i>        | -0.086 | 0.013 | 2.70E-11 | 44.38        |
| rs1047891   | 2   | 211540507 | A             | C            | 0.31 | <i>CPS1</i>         | -0.024 | 0.004 | 2.09E-08 | 31.41        |
| rs9288447   | 2   | 213083638 | T             | C            | 0.55 | <i>ERBB4</i>        | -0.023 | 0.004 | 3.27E-09 | 35.02        |



|            |   |           |   |   |      |                |        |       |           |         |
|------------|---|-----------|---|---|------|----------------|--------|-------|-----------|---------|
| rs2581817  | 3 | 53071797  | C | G | 0.42 | <i>SFMBT1</i>  | 0.048  | 0.004 | 4.87E-35  | 152.52  |
| rs11128111 | 3 | 69145632  | T | C | 0.48 | <i>ARL6IP5</i> | -0.021 | 0.004 | 4.64E-08  | 29.86   |
| rs7640441  | 3 | 125118082 | A | C | 0.25 | <i>ZNF148</i>  | -0.028 | 0.005 | 1.26E-09  | 36.88   |
| rs80120242 | 3 | 132235344 | A | T | 0.95 | <i>DNAJC13</i> | -0.062 | 0.010 | 1.87E-09  | 36.11   |
| rs4447862  | 4 | 9931645   | C | G | 0.73 | <i>SLC2A9</i>  | 0.330  | 0.004 | 0.00E+00  | 6136.85 |
| rs98270    | 4 | 48019323  | A | G | 0.36 | <i>NIPAL1</i>  | 0.022  | 0.004 | 4.21E-08  | 30.05   |
| rs10857147 | 4 | 81181072  | A | T | 0.71 | <i>FGF5</i>    | 0.024  | 0.004 | 2.21E-08  | 31.30   |
| rs74904971 | 4 | 89050026  | A | C | 0.11 | <i>ABCG2</i>   | 0.254  | 0.006 | 0.00E+00  | 1763.06 |
| rs1440411  | 4 | 144158285 | T | C | 0.57 | <i>USP38</i>   | -0.028 | 0.004 | 1.08E-12  | 50.69   |
| rs455213   | 5 | 34660235  | T | C | 0.54 | <i>RAI14</i>   | -0.027 | 0.004 | 6.05E-12  | 47.31   |
| rs10942549 | 5 | 72426137  | C | G | 0.31 | <i>TMEM171</i> | -0.042 | 0.004 | 1.64E-22  | 95.29   |
| rs76004499 | 5 | 176705865 | C | G | 0.97 | <i>NSD1</i>    | -0.074 | 0.013 | 3.26E-08  | 30.54   |
| rs12530084 | 6 | 7214676   | T | C | 0.22 | <i>RREB1</i>   | 0.066  | 0.005 | 9.55E-48  | 210.73  |
| rs1359232  | 6 | 25809716  | A | C | 0.47 | <i>SLC17A1</i> | -0.091 | 0.004 | 4.12E-126 | 570.61  |
| rs1574430  | 6 | 43269029  | A | C | 0.41 | <i>SLC22A7</i> | 0.029  | 0.004 | 2.77E-14  | 57.89   |
| rs10223666 | 6 | 43805502  | C | G | 0.70 | <i>VEGFA</i>   | 0.046  | 0.004 | 6.62E-28  | 119.91  |
| rs4897160  | 6 | 126223944 | A | G | 0.48 | <i>NCOA7</i>   | 0.030  | 0.004 | 1.96E-14  | 58.57   |
| rs62435145 | 7 | 1286567   | T | G | 0.69 | <i>UNCX</i>    | 0.042  | 0.005 | 2.36E-16  | 67.28   |
| rs13226650 | 7 | 73017005  | A | G | 0.81 | <i>MLXIPL</i>  | 0.049  | 0.005 | 1.34E-23  | 100.25  |
| rs11551890 | 7 | 97845713  | A | G | 0.51 | <i>TECPR1</i>  | 0.023  | 0.004 | 2.40E-08  | 31.14   |
| rs10480300 | 7 | 151406005 | T | C | 0.28 | <i>PRKAG2</i>  | 0.030  | 0.004 | 4.26E-12  | 48.00   |
| rs34861762 | 8 | 23748420  | T | C | 0.42 | <i>STC1</i>    | 0.034  | 0.004 | 3.50E-19  | 80.13   |
| rs2466077  | 8 | 32432753  | T | G | 0.53 | <i>NRG1</i>    | -0.022 | 0.004 | 1.78E-08  | 31.72   |
| rs2943539  | 8 | 76479839  | T | C | 0.48 | <i>HNF4G</i>   | 0.041  | 0.004 | 6.42E-28  | 119.97  |

|            |    |           |   |   |      |                     |        |       |          |        |
|------------|----|-----------|---|---|------|---------------------|--------|-------|----------|--------|
| rs10956924 | 8  | 95678312  | T | C | 0.28 | <i>ESRP1</i>        | -0.024 | 0.004 | 1.79E-08 | 31.72  |
| rs10971420 | 9  | 33125000  | T | C | 0.69 | <i>B4GALT1</i>      | 0.031  | 0.004 | 4.14E-14 | 57.10  |
| rs56106601 | 9  | 130770484 | A | C | 0.95 | <i>FAM102A</i>      | 0.061  | 0.009 | 2.67E-11 | 44.40  |
| rs74440730 | 10 | 16920892  | A | C | 0.89 | <i>CUBN</i>         | -0.037 | 0.006 | 2.22E-09 | 35.77  |
| rs10994860 | 10 | 52645424  | T | C | 0.18 | <i>A1CF</i>         | 0.064  | 0.005 | 1.31E-36 | 159.71 |
| rs1649078  | 10 | 60293320  | A | C | 0.48 | <i>BICC1</i>        | -0.039 | 0.004 | 4.08E-19 | 79.83  |
| rs1171617  | 10 | 61467182  | T | G | 0.77 | <i>SLC16A9</i>      | 0.079  | 0.005 | 1.81E-66 | 296.61 |
| rs9420446  | 10 | 88880689  | T | C | 0.14 | <i>FAM35A</i>       | -0.038 | 0.006 | 1.13E-11 | 46.09  |
| rs35198068 | 10 | 114754784 | T | C | 0.71 | <i>TCF7L2</i>       | 0.025  | 0.004 | 5.85E-09 | 33.88  |
| rs35506085 | 11 | 2165576   | A | G | 0.19 | <i>IGF2</i>         | -0.029 | 0.005 | 1.50E-08 | 32.06  |
| rs3925584  | 11 | 30760335  | T | C | 0.55 | <i>DCDC1</i>        | 0.030  | 0.004 | 1.66E-15 | 63.43  |
| rs71456318 | 11 | 64332862  | A | C | 0.48 | <i>SLC22A11</i>     | 0.079  | 0.004 | 4.41E-92 | 414.23 |
| rs10896028 | 11 | 65432187  | A | T | 0.65 | <i>RELA</i>         | -0.048 | 0.004 | 4.10E-33 | 143.72 |
| rs10892354 | 11 | 119238381 | T | C | 0.38 | <i>USP2</i>         | 0.030  | 0.004 | 2.60E-13 | 53.49  |
| rs7303595  | 12 | 15359063  | A | T | 0.34 | <i>RERG</i>         | 0.025  | 0.004 | 7.05E-10 | 38.01  |
| rs7315236  | 12 | 52251933  | T | C | 0.36 | <i>LOC105369971</i> | 0.029  | 0.004 | 1.91E-13 | 54.10  |
| rs12313306 | 12 | 57751854  | T | C | 0.25 | <i>R3HDM2</i>       | -0.076 | 0.004 | 6.74E-65 | 289.40 |
| rs10774625 | 12 | 111910219 | A | G | 0.48 | <i>ATXN2</i>        | 0.032  | 0.004 | 5.54E-17 | 70.14  |
| rs1800574  | 12 | 121416864 | T | C | 0.03 | <i>HNF1A</i>        | -0.081 | 0.012 | 2.84E-12 | 48.80  |
| rs28530689 | 12 | 122500748 | A | C | 0.51 | <i>LOC100506691</i> | 0.032  | 0.004 | 1.27E-16 | 68.50  |
| rs12423664 | 12 | 133069894 | A | G | 0.15 | <i>FBRS1</i>        | 0.042  | 0.006 | 1.75E-13 | 54.27  |
| rs7986094  | 13 | 31029931  | A | C | 0.30 | <i>HMGB1</i>        | -0.024 | 0.004 | 1.74E-08 | 31.77  |
| rs626277   | 13 | 72347696  | A | C | 0.59 | <i>DACH1</i>        | 0.026  | 0.004 | 2.69E-11 | 44.39  |
| rs861536   | 14 | 104167564 | A | G | 0.62 | <i>KLC1</i>         | 0.024  | 0.004 | 2.16E-09 | 35.82  |

|            |    |          |   |   |      |                 |        |       |          |        |
|------------|----|----------|---|---|------|-----------------|--------|-------|----------|--------|
| rs1478604  | 15 | 39873321 | T | C | 0.71 | <i>THBS1</i>    | -0.026 | 0.004 | 4.49E-10 | 38.89  |
| rs2929508  | 15 | 72246964 | A | T | 0.26 | <i>MYO9A</i>    | -0.029 | 0.005 | 3.65E-09 | 34.80  |
| rs8040109  | 15 | 73334225 | A | C | 0.71 | <i>NEO1</i>     | 0.025  | 0.004 | 5.85E-09 | 33.88  |
| rs10851885 | 15 | 76304503 | A | G | 0.76 | <i>NRG4</i>     | -0.054 | 0.005 | 4.16E-32 | 139.11 |
| rs55781567 | 15 | 78857986 | C | G | 0.65 | <i>CHRNA5</i>   | 0.023  | 0.004 | 1.10E-08 | 32.65  |
| rs12908437 | 15 | 99287375 | T | C | 0.38 | <i>IGF1R</i>    | 0.046  | 0.004 | 1.56E-30 | 131.92 |
| rs4997081  | 16 | 20365234 | C | G | 0.20 | <i>UMOD</i>     | -0.030 | 0.005 | 4.18E-10 | 39.03  |
| rs8050136  | 16 | 53816275 | A | C | 0.40 | <i>FTO</i>      | 0.025  | 0.004 | 2.34E-10 | 40.16  |
| rs62052820 | 16 | 69575238 | A | G | 0.21 | <i>MIR1538</i>  | 0.041  | 0.005 | 2.81E-18 | 76.02  |
| rs4788815  | 16 | 71634811 | A | T | 0.36 | <i>TAT</i>      | -0.026 | 0.004 | 7.44E-11 | 42.40  |
| rs57652769 | 16 | 79753976 | T | C | 0.31 | <i>MAFTRR</i>   | -0.036 | 0.004 | 8.56E-18 | 73.82  |
| rs11644696 | 16 | 81572093 | A | G | 0.48 | <i>CMIP</i>     | 0.022  | 0.004 | 1.41E-08 | 32.17  |
| rs2453580  | 17 | 19438321 | T | C | 0.60 | <i>SLC47A1</i>  | 0.025  | 0.004 | 7.01E-10 | 38.02  |
| rs3794748  | 17 | 53365172 | A | G | 0.41 | <i>HLF</i>      | 0.038  | 0.004 | 1.38E-21 | 91.08  |
| rs9895661  | 17 | 59456589 | T | C | 0.82 | <i>BCAS3</i>    | 0.050  | 0.005 | 7.23E-23 | 96.92  |
| rs11663816 | 18 | 57876227 | T | C | 0.73 | <i>MC4R</i>     | -0.030 | 0.004 | 1.40E-12 | 50.18  |
| rs57070985 | 19 | 4969053  | A | G | 0.65 | <i>KDM4B</i>    | 0.029  | 0.004 | 2.04E-12 | 49.44  |
| rs10405423 | 19 | 7211311  | A | C | 0.66 | <i>INSR</i>     | 0.039  | 0.004 | 1.07E-20 | 87.03  |
| rs4808762  | 19 | 18326222 | T | C | 0.72 | <i>PDE4C</i>    | -0.024 | 0.004 | 1.36E-08 | 32.25  |
| rs2868194  | 19 | 33350060 | T | C | 0.41 | <i>SLC7A9</i>   | -0.027 | 0.004 | 8.90E-12 | 46.56  |
| rs35396326 | 19 | 45357003 | C | G | 0.70 | <i>NECTIN2</i>  | 0.025  | 0.004 | 2.30E-08 | 31.22  |
| rs62128132 | 19 | 50217955 | T | C | 0.97 | <i>CPT1C</i>    | -0.118 | 0.015 | 1.32E-15 | 63.88  |
| rs7267595  | 20 | 10643850 | A | C | 0.51 | <i>JAG1</i>     | 0.023  | 0.004 | 3.15E-09 | 35.09  |
| rs6119510  | 20 | 33287782 | T | G | 0.60 | <i>TP53INP2</i> | -0.023 | 0.004 | 3.20E-09 | 35.06  |

|            |    |          |   |   |      |               |        |       |          |       |
|------------|----|----------|---|---|------|---------------|--------|-------|----------|-------|
| rs1800961  | 20 | 43042364 | T | C | 0.03 | <i>HNF4A</i>  | -0.076 | 0.012 | 1.63E-10 | 40.87 |
| rs219781   | 21 | 37832621 | T | G | 0.25 | <i>CLDN14</i> | -0.025 | 0.004 | 1.56E-08 | 31.97 |
| rs12485100 | 22 | 44325516 | T | G | 0.17 | <i>PNPLA3</i> | -0.033 | 0.005 | 2.44E-10 | 40.08 |

---

Abbreviations: SNP, single-nucleotide polymorphisms; Chr, chromosome; Pos, position; EAF, effect allele frequency; SE, standard error.

**Table S9 Genetic association for serum UA and functional outcomes of stroke in GISCOME.**

| SNP        | beta.exposure | se.exposure | beta.outcome | se.outcome |
|------------|---------------|-------------|--------------|------------|
| rs10223666 | 0.046         | 0.004       | -0.0478      | 0.0537     |
| rs10405423 | 0.039         | 0.004       | 4.00E-04     | 0.0531     |
| rs1047891  | -0.024        | 0.004       | -0.0297      | 0.0548     |
| rs10480300 | 0.03          | 0.004       | 0.1478       | 0.0547     |
| rs10774625 | 0.032         | 0.004       | 0.0549       | 0.049      |
| rs10851885 | -0.054        | 0.005       | -0.0432      | 0.0579     |
| rs10857147 | 0.024         | 0.004       | -0.0301      | 0.0533     |
| rs10892354 | 0.03          | 0.004       | -0.0345      | 0.0503     |
| rs10896028 | -0.048        | 0.004       | -0.0111      | 0.0515     |
| rs10942549 | -0.042        | 0.004       | -0.0574      | 0.0542     |
| rs10956924 | -0.024        | 0.004       | 0.0695       | 0.0542     |
| rs10971420 | 0.031         | 0.004       | -0.0581      | 0.0532     |
| rs10994860 | 0.064         | 0.005       | -0.0212      | 0.0636     |
| rs11128111 | -0.021        | 0.004       | -0.0758      | 0.0494     |
| rs11204701 | -0.036        | 0.005       | -0.0658      | 0.0592     |
| rs11551890 | 0.023         | 0.004       | 0.0309       | 0.0517     |
| rs11644696 | 0.022         | 0.004       | -0.037       | 0.0495     |
| rs11663816 | -0.03         | 0.004       | -0.0151      | 0.0553     |
| rs11683692 | -0.048        | 0.008       | -0.0926      | 0.1162     |
| rs1171617  | 0.079         | 0.005       | 0.0132       | 0.0585     |
| rs12037861 | 0.023         | 0.004       | 0.0238       | 0.0533     |
| rs12313306 | -0.076        | 0.004       | 0.069        | 0.0572     |

|             |        |       |         |        |
|-------------|--------|-------|---------|--------|
| rs1234413   | -0.022 | 0.004 | 0.0613  | 0.0491 |
| rs12423664  | 0.042  | 0.006 | 0.0295  | 0.0701 |
| rs12472381  | 0.022  | 0.004 | 0.0251  | 0.0505 |
| rs12485100  | -0.033 | 0.005 | -0.0353 | 0.0663 |
| rs12530084  | 0.066  | 0.005 | -0.0568 | 0.0589 |
| rs1260326   | 0.07   | 0.004 | -0.1244 | 0.0504 |
| rs12908437  | 0.046  | 0.004 | -0.0216 | 0.0497 |
| rs12987661  | 0.041  | 0.006 | -0.0273 | 0.0748 |
| rs1359232   | -0.091 | 0.004 | -0.0639 | 0.0498 |
| rs141990161 | 0.133  | 0.023 | -0.6016 | 0.2822 |
| rs1440411   | -0.028 | 0.004 | 0.0726  | 0.0497 |
| rs1478604   | -0.026 | 0.004 | -0.0279 | 0.0537 |
| rs1574430   | 0.029  | 0.004 | 0.0436  | 0.0501 |
| rs1649078   | -0.039 | 0.004 | 0.0473  | 0.05   |
| rs17050272  | 0.032  | 0.004 | 0.0597  | 0.0501 |
| rs1800574   | -0.081 | 0.012 | -0.1703 | 0.16   |
| rs1800961   | -0.076 | 0.012 | -0.1494 | 0.1366 |
| rs187355703 | -0.086 | 0.013 | 0.2088  | 0.1713 |
| rs2070803   | 0.053  | 0.004 | 0.0392  | 0.0494 |
| rs219781    | -0.025 | 0.004 | -0.0911 | 0.0576 |
| rs2453580   | 0.025  | 0.004 | 0.0037  | 0.0516 |
| rs2466077   | -0.022 | 0.004 | 0.0483  | 0.0496 |
| rs2480712   | 0.024  | 0.004 | -0.0157 | 0.0521 |
| rs2581817   | 0.048  | 0.004 | -0.1508 | 0.0498 |

|            |        |       |         |        |
|------------|--------|-------|---------|--------|
| rs2760215  | -0.025 | 0.004 | 0.0206  | 0.0487 |
| rs28530689 | 0.032  | 0.004 | -0.0708 | 0.0492 |
| rs2867112  | 0.035  | 0.005 | 0.1156  | 0.068  |
| rs2868194  | -0.027 | 0.004 | 0.0685  | 0.0499 |
| rs2929508  | -0.029 | 0.005 | -0.0062 | 0.0564 |
| rs2943539  | 0.041  | 0.004 | 0.1324  | 0.0488 |
| rs34861762 | 0.034  | 0.004 | 0.0094  | 0.0488 |
| rs35198068 | 0.025  | 0.004 | -0.1267 | 0.0538 |
| rs35396326 | 0.025  | 0.004 | 0.013   | 0.0561 |
| rs35506085 | -0.029 | 0.005 | -0.0362 | 0.0622 |
| rs3794748  | 0.038  | 0.004 | 0.0537  | 0.0505 |
| rs3925584  | 0.03   | 0.004 | -0.0873 | 0.049  |
| rs4447862  | 0.33   | 0.004 | 0.0546  | 0.0548 |
| rs455213   | -0.027 | 0.004 | 0.0787  | 0.05   |
| rs4646068  | 0.024  | 0.004 | 0.0941  | 0.0535 |
| rs4788815  | -0.026 | 0.004 | 0.0065  | 0.0513 |
| rs4808762  | -0.024 | 0.004 | 0.0414  | 0.0547 |
| rs4897160  | 0.03   | 0.004 | 0.0319  | 0.049  |
| rs4997081  | -0.03  | 0.005 | 0.1027  | 0.0634 |
| rs55781567 | 0.023  | 0.004 | 0.0714  | 0.0513 |
| rs56106601 | 0.061  | 0.009 | -0.0061 | 0.1217 |
| rs57070985 | 0.029  | 0.004 | 0.0017  | 0.0524 |
| rs57652769 | -0.036 | 0.004 | 0.0688  | 0.0524 |
| rs6119510  | -0.023 | 0.004 | -0.0615 | 0.0495 |

|            |        |       |         |        |
|------------|--------|-------|---------|--------|
| rs62052820 | 0.041  | 0.005 | 0.0136  | 0.0584 |
| rs62128132 | -0.118 | 0.015 | 0.0889  | 0.1622 |
| rs62435145 | 0.042  | 0.005 | -0.0174 | 0.053  |
| rs626277   | 0.026  | 0.004 | 0.0366  | 0.05   |
| rs71456318 | 0.079  | 0.004 | 0.0435  | 0.0492 |
| rs7267595  | 0.023  | 0.004 | 0.0507  | 0.0488 |
| rs72782806 | 0.025  | 0.004 | -0.0141 | 0.0575 |
| rs7303595  | 0.025  | 0.004 | 0.0556  | 0.0532 |
| rs7315236  | 0.029  | 0.004 | -0.0833 | 0.0514 |
| rs74440730 | -0.037 | 0.006 | 0.0051  | 0.0783 |
| rs74904971 | 0.254  | 0.006 | -0.0698 | 0.0874 |
| rs76004499 | -0.074 | 0.013 | 0.0809  | 0.1718 |
| rs7640441  | -0.028 | 0.005 | -0.0591 | 0.0572 |
| rs79598313 | 0.1    | 0.013 | 0.0546  | 0.165  |
| rs7986094  | -0.024 | 0.004 | -0.0491 | 0.054  |
| rs80120242 | -0.062 | 0.01  | 0.1814  | 0.1222 |
| rs8040109  | 0.025  | 0.004 | 0.0298  | 0.0536 |
| rs8050136  | 0.025  | 0.004 | 0.0309  | 0.0495 |
| rs861536   | 0.024  | 0.004 | 0.0133  | 0.0506 |
| rs9287911  | 0.038  | 0.004 | -0.0019 | 0.0562 |
| rs9288447  | -0.023 | 0.004 | -0.0598 | 0.05   |
| rs9420446  | -0.038 | 0.006 | 0.047   | 0.071  |
| rs98270    | 0.022  | 0.004 | 0.0272  | 0.0515 |

---

Abbreviations: GISCOME, Genetics of Ischemic Stroke Functional Outcome network; SNP, single nucleotide polymorphism; Se, standard error.



**Table S10. Mendelian randomization association of genetically predicted serum urate level with functional outcomes using different statistical models.**

| Outcome                               | Method                    | nsnp | P for Cochran's Q | P <sub>intercept</sub> | OR   | 95%CI       | P value |
|---------------------------------------|---------------------------|------|-------------------|------------------------|------|-------------|---------|
| Functional outcome                    | Inverse variance weighted | 93   | 0.294             | 0.610                  | 1.07 | (0.89-1.30) | 0.461   |
|                                       | MR Egger                  | 93   |                   |                        | 1.02 | (0.78-1.34) | 0.881   |
|                                       | Weighted median           | 93   |                   |                        | 1.07 | (0.82-1.40) | 0.597   |
|                                       | Simple mode               | 93   |                   |                        | 1.33 | (0.62-2.87) | 0.467   |
|                                       | Weighted mode             | 93   |                   |                        | 1.10 | (0.86-1.40) | 0.446   |
| Functional outcome_NIHSS <sup>a</sup> | Inverse variance weighted | 93   | 0.052             | 0.785                  | 1.03 | (0.82-1.31) | 0.741   |
|                                       | MR Egger                  | 93   |                   |                        | 1.00 | (0.71-1.40) | 0.862   |
|                                       | Weighted median           | 93   |                   |                        | 1.18 | (0.85-1.62) | 0.947   |
|                                       | Simple mode               | 93   |                   |                        | 1.86 | (0.76-4.59) | 0.796   |
|                                       | Weighted mode             | 93   |                   |                        | 1.14 | (0.86-1.51) | 0.844   |

<sup>a</sup>: Mendelian randomization utilized the summary data of 3-month functional outcomes of ischemic stroke from the Genetics of Ischemic Stroke Functional Outcome Network adjusted for age, sex, ancestry and baseline NIHSS.

P<sub>intercept</sub>: P for MR-Egger intercept test to quantify the effect of directional pleiotropy. Values that significantly differ from zero indicated potential pleiotropy, which suggested exposure-associated genetic variables may influence the outcome through other pathways rather than through exposure.

Abbreviations: OR odds ratio; CI, confidence interval.

**Table S11 6SNPs and effect sizes for functional outcome.**

| SNP        | Effect Allele | Other Allele | EAF    | Beta    | Se     | P-value     | F-statistics |
|------------|---------------|--------------|--------|---------|--------|-------------|--------------|
| rs1842681  | A             | G            | 0.2341 | 0.3395  | 0.0582 | 5.272E-09   | 34.03        |
| rs73712229 | A             | C            | 0.0662 | 0.4683  | 0.0965 | 0.000001224 | 23.55        |
| rs59665378 | T             | C            | 0.4676 | -0.2346 | 0.0499 | 0.000002565 | 22.10        |
| rs2236406  | T             | C            | 0.6446 | -0.2401 | 0.0517 | 0.000003427 | 21.57        |
| rs80078009 | T             | C            | 0.036  | 0.7189  | 0.1556 | 0.000003829 | 21.35        |
| rs76926687 | T             | C            | 0.0174 | 1.0006  | 0.2184 | 0.000004603 | 20.99        |

Abbreviations: SNP, single-nucleotide polymorphisms; EAF, effect allele frequency; SE, standard error.

**Table S12 The reverse causal effect of functional outcome of stroke on serum urate levels using different statistical models.**

| Outcome   | Method                    | nsnp | P for Cochran's Q | P <sub>intercept</sub> | Beta   | 95%CI          | P value |
|-----------|---------------------------|------|-------------------|------------------------|--------|----------------|---------|
| Uric Acid | Inverse variance weighted | 4    | 0.962             | 0.901                  | -0.012 | (-0.027,0.004) | 0.143   |
|           | MR Egger                  | 4    |                   |                        | -0.013 | (-0.055,0.030) | 0.619   |
|           | Weighted median           | 4    |                   |                        | -0.009 | (-0.027,0.008) | 0.307   |
|           | Simple mode               | 4    |                   |                        | -0.008 | (-0.033,0.018) | 0.599   |
|           | Weighted mode             | 4    |                   |                        | -0.007 | (-0.029,0.015) | 0.568   |

P<sub>intercept</sub>: P for MR-Egger intercept test to quantify the effect of directional pleiotropy. Values that significantly differ from zero indicated potential pleiotropy, which suggested exposure-associated genetic variables may influence the outcome through other pathways rather than through exposure.

Abbreviations: OR odds ratio; CI, confidence interval.

**Table S13 Genetic association for serum UA and Ischemic stroke.**

| Outcome         | Method                    | nsnp | P for Cochran's Q | P <sub>intercept</sub> | OR   | 95%CI       | P value |
|-----------------|---------------------------|------|-------------------|------------------------|------|-------------|---------|
| Ischemic stroke | Inverse variance weighted | 71   | 0.002             | 0.022                  | 0.94 | (0.89-0.99) | 0.025   |
|                 | MR Egger                  | 71   |                   |                        | 1.03 | (0.94-1.13) | 0.521   |
|                 | Weighted median           | 71   |                   |                        | 0.99 | (0.93-1.06) | 0.854   |
|                 | Simple mode               | 71   |                   |                        | 0.99 | (0.86-1.13) | 0.864   |
|                 | Weighted mode             | 71   |                   |                        | 1.01 | (0.95-1.09) | 0.672   |

P<sub>intercept</sub>: P for MR-Egger intercept test to quantify the effect of directional pleiotropy. Values that significantly differ from zero indicated potential pleiotropy, which suggested exposure-associated genetic variables may influence the outcome through other pathways rather than through exposure.

Abbreviations: OR odds ratio; CI, confidence interval.

## 4. Supplemental Figures

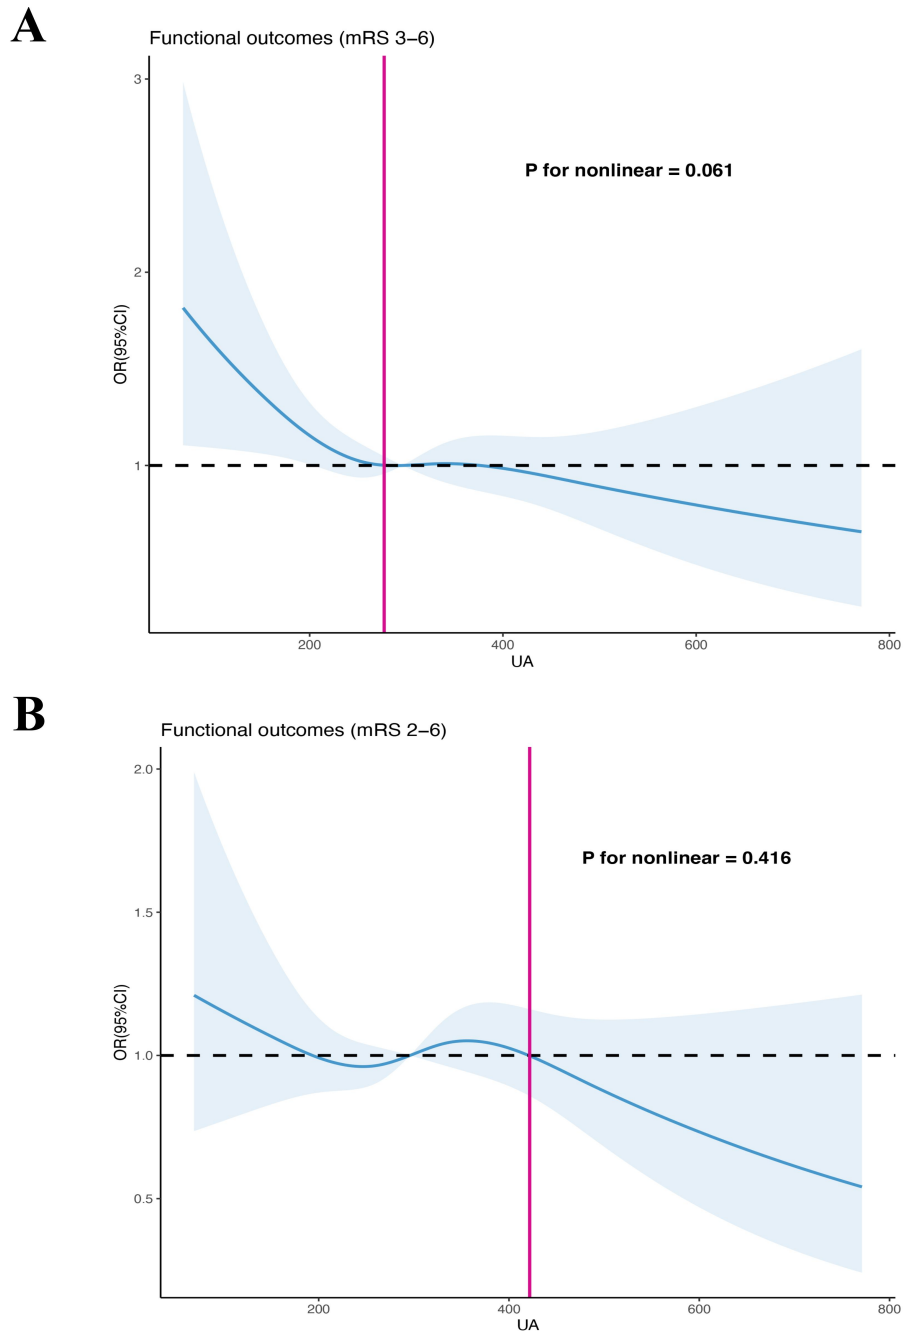

**Figure S1 Analysis of restricted cubic spline regression with functional outcome (mRS 3-6 and mRS 2-6).**

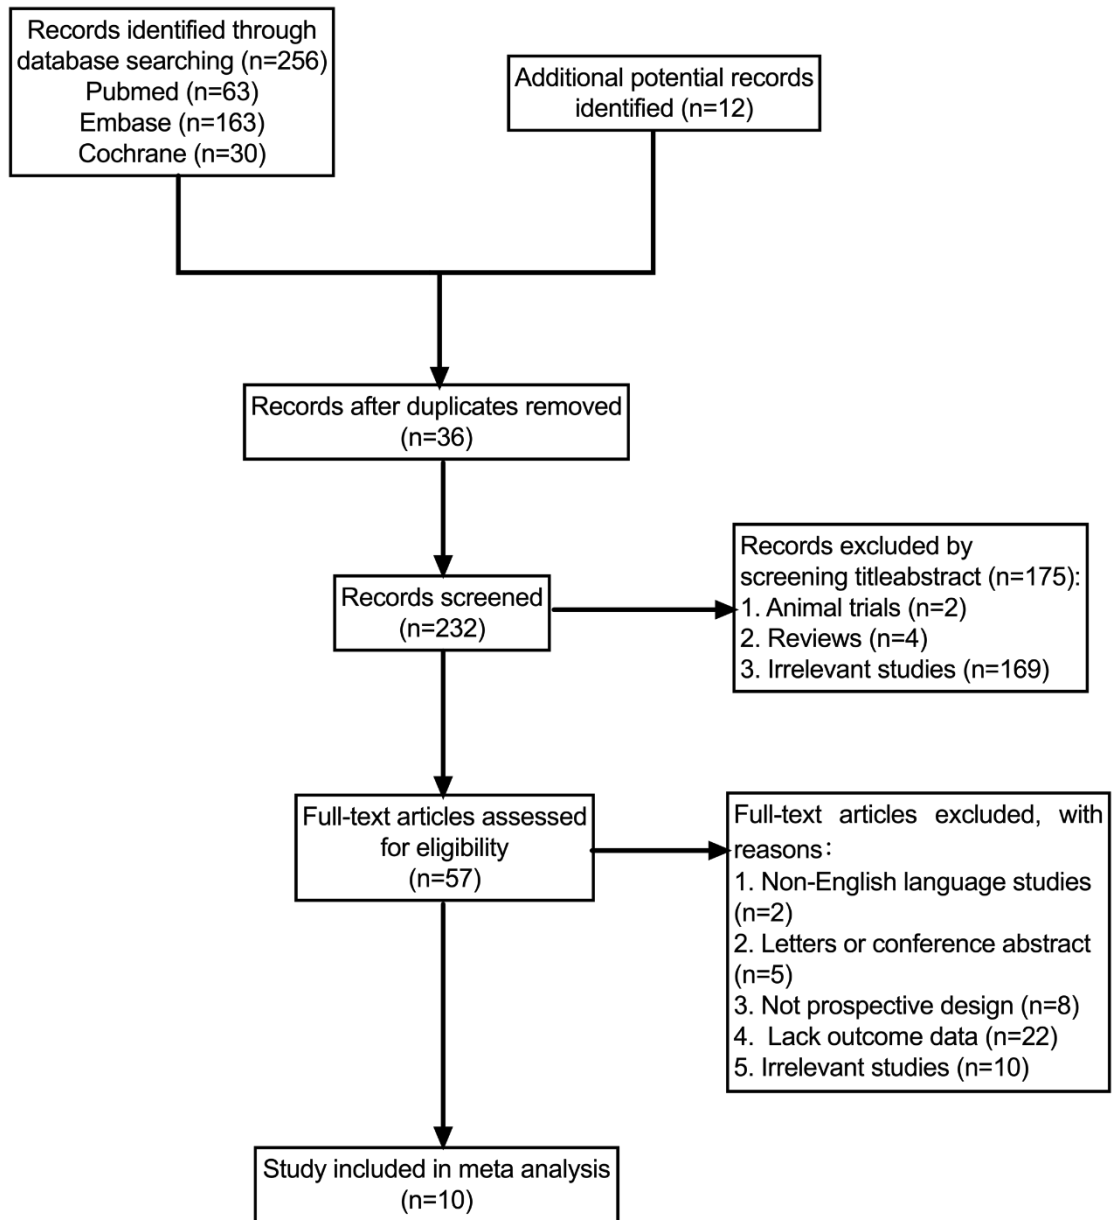

**Figure S2 Study identification and selection in the Meta-analysis.**

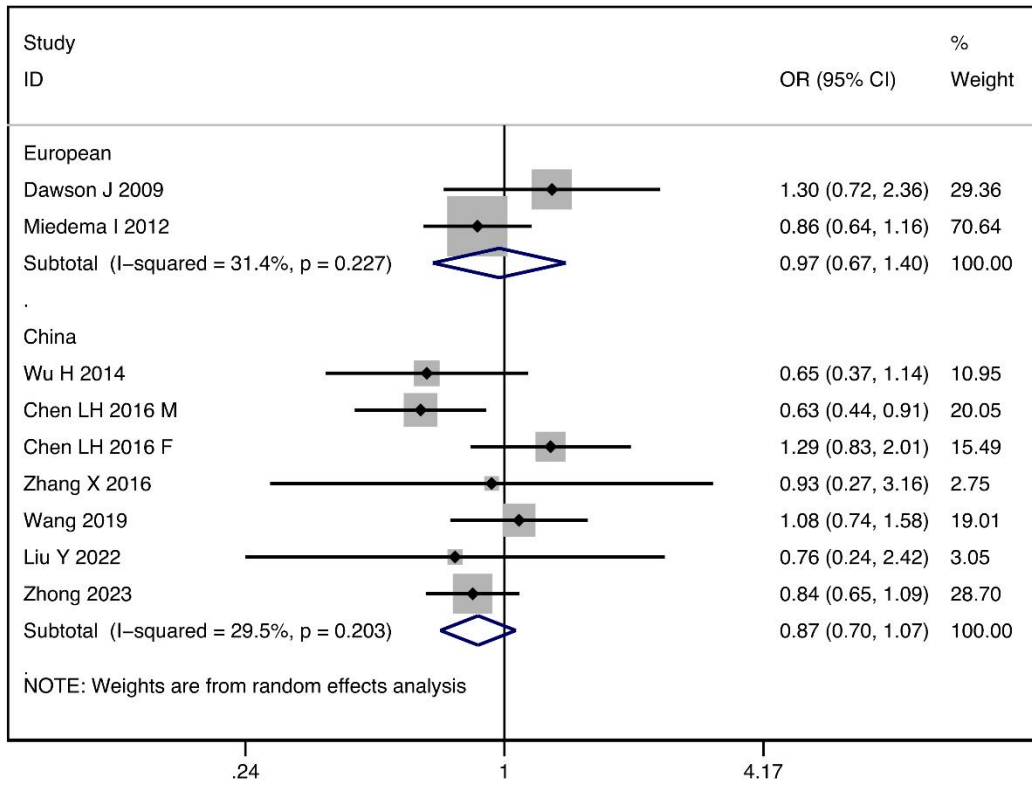

**Figure S3 Forest plots of the subgroup analyses on race in relation to serum UA levels between prognosis of stroke.**

Note: The size of gray box is positively proportional to the weight assigned to each study, and horizontal lines represent the 95% confidence intervals

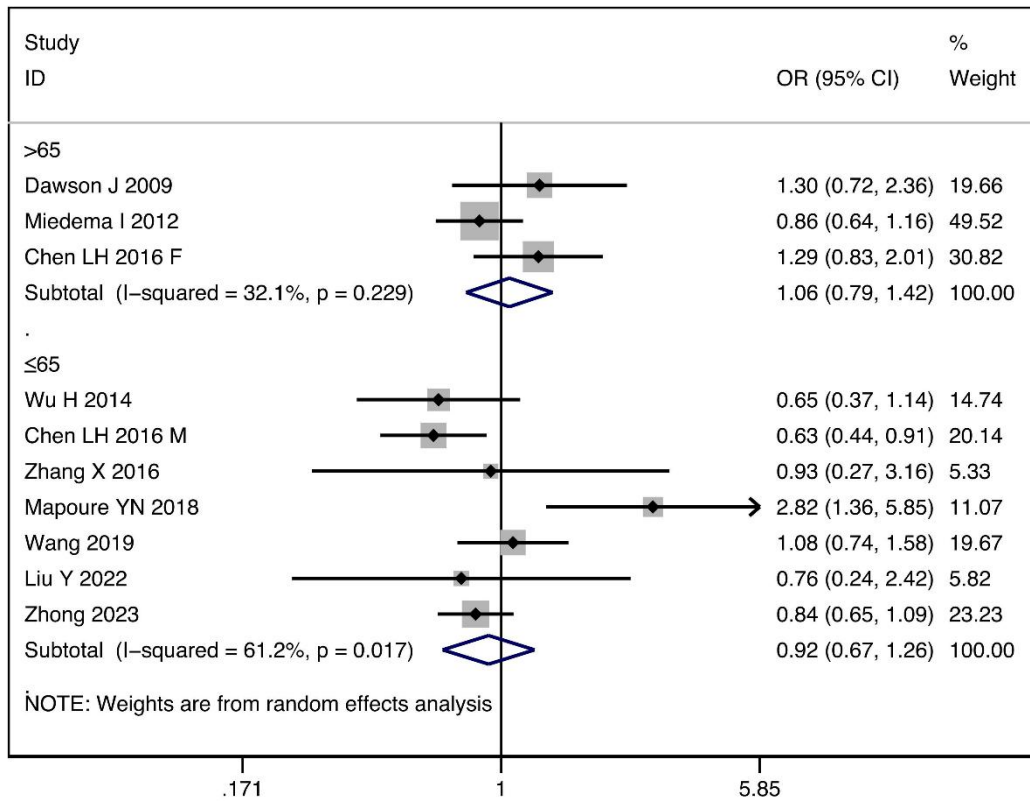

**Figure S4 Forest plots of the subgroup analyses on age in relation to serum UA levels between prognosis of stroke.**

Note: The size of gray box is positively proportional to the weight assigned to each study, and horizontal lines represent the 95% confidence intervals.



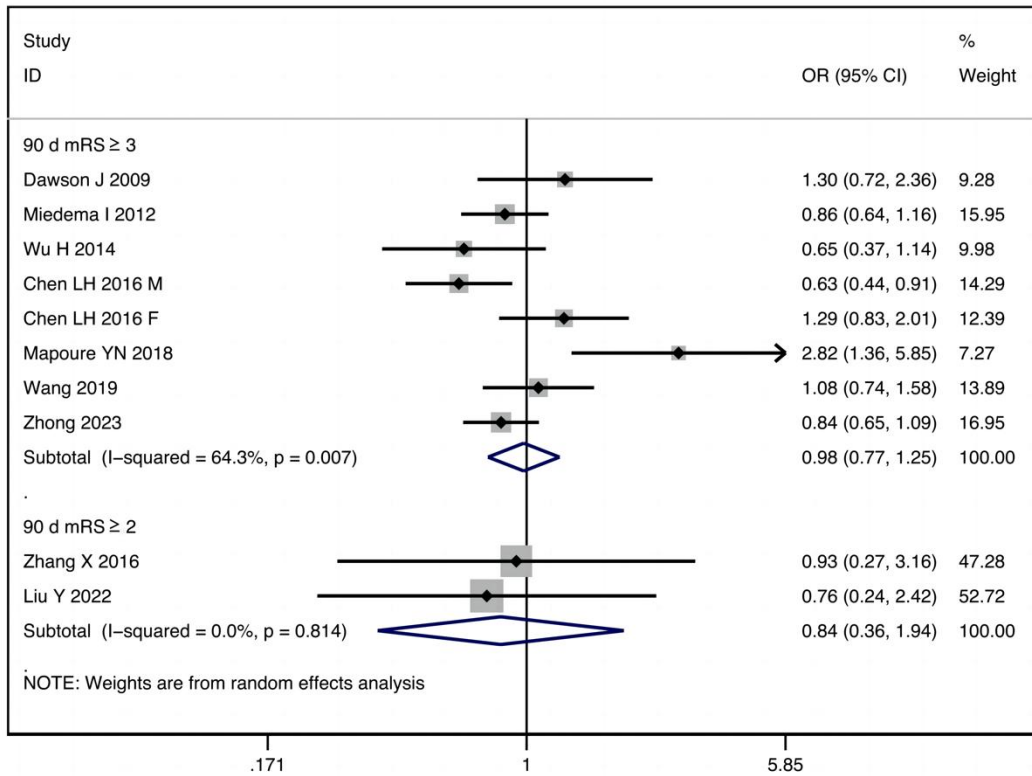

**Figure S5 Forest plots of the subgroup analyses on different outcome definition in relation to serum UA levels between prognosis of stroke.**

Note: The size of gray box is positively proportional to the weight assigned to each study, and horizontal lines represent the 95% confidence intervals.

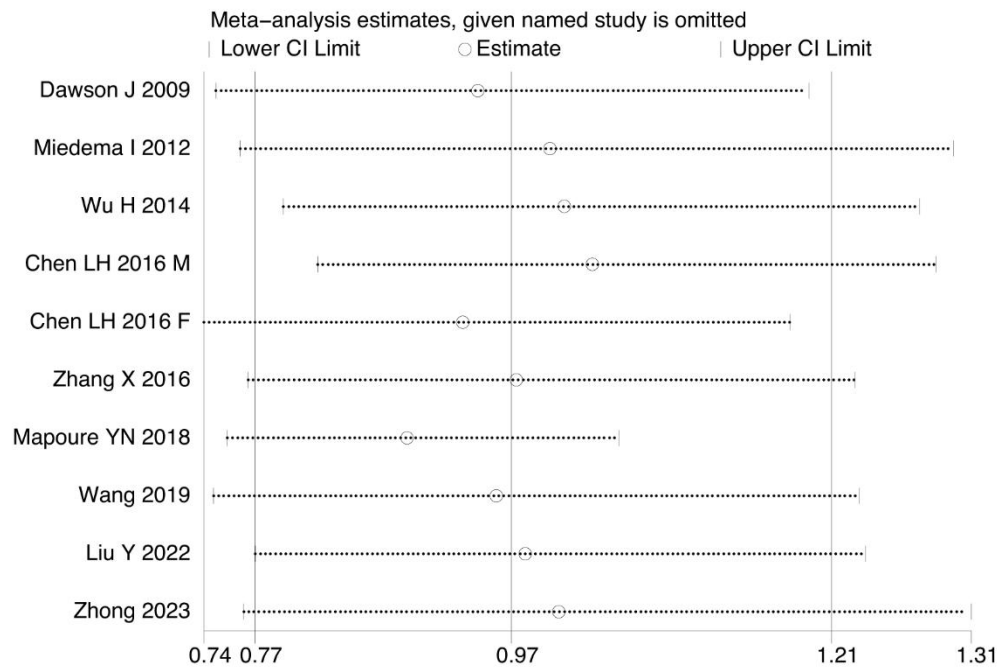

**Figure S6 The sensitive plot on the association of uric acid levels and stroke prognosis with the exclusion of lower-quality studies.**

Abbreviations: CI, confidence interval.

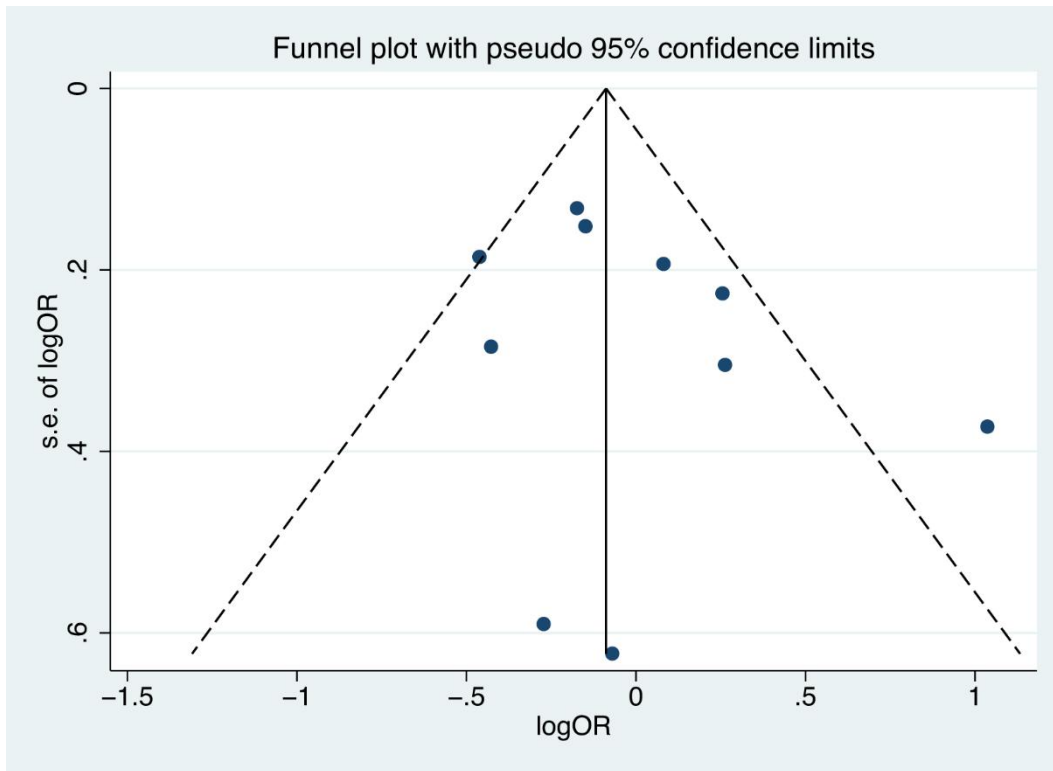

**Figure S7 Funnel plots on the association of uric acid levels and poor outcomes of strokes.**

Note: Egger test showed no evidence of publication bias (p for publication bias was 0.324)

Abbreviations: rr, risk ratio; s.e., standard error.

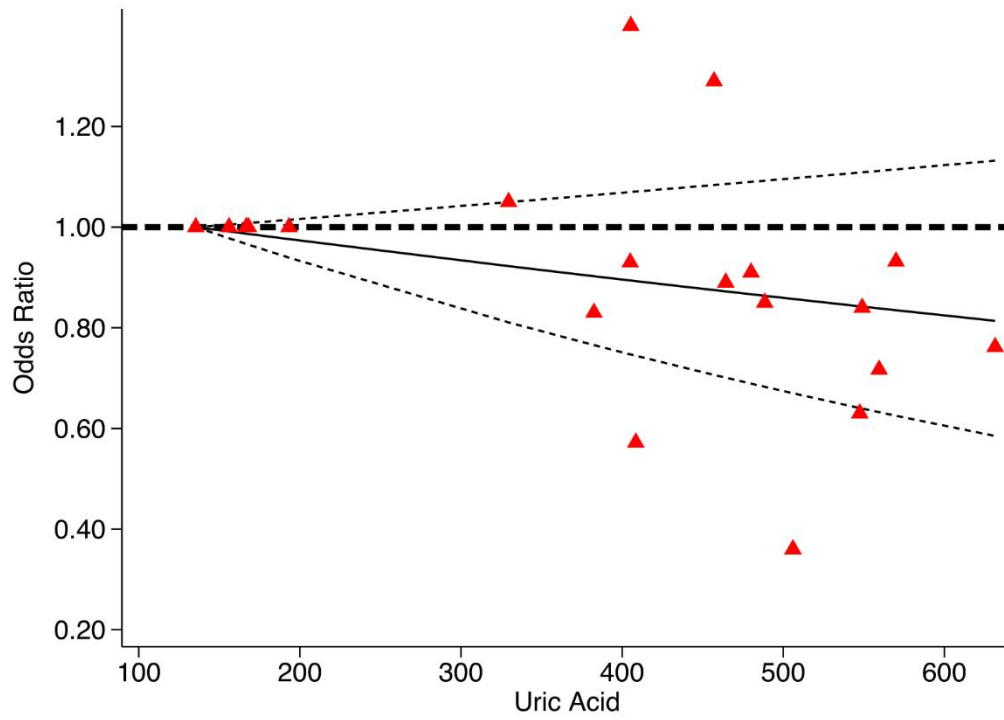

**Figure S8 Linear does-response analyses of UA and stroke prognosis.**

Note: The red triangle represents the OR of each study, the dashed line is the 95% confidence interval, and the solid line in the middle is the OR of the estimated nonlinear curve.

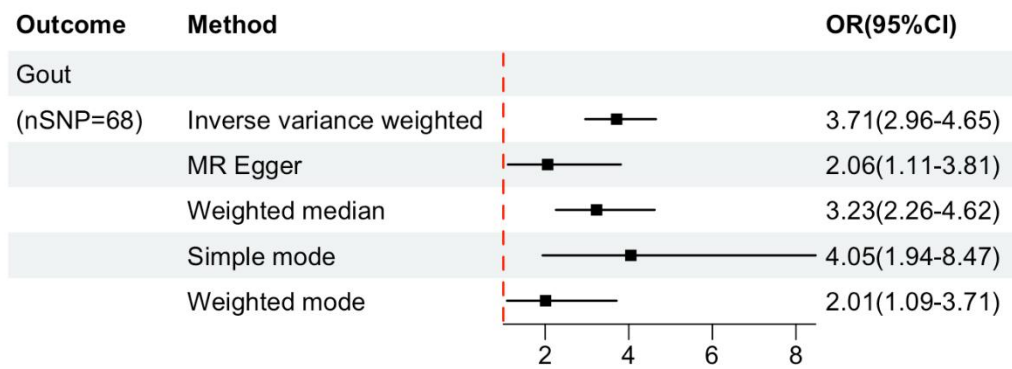

**Figure S9 Mendelian randomization association of genetically predicted serum uric acid level with gout using different statistical models.**

Abbreviations: OR, odd ratio; CI, confidence interval.

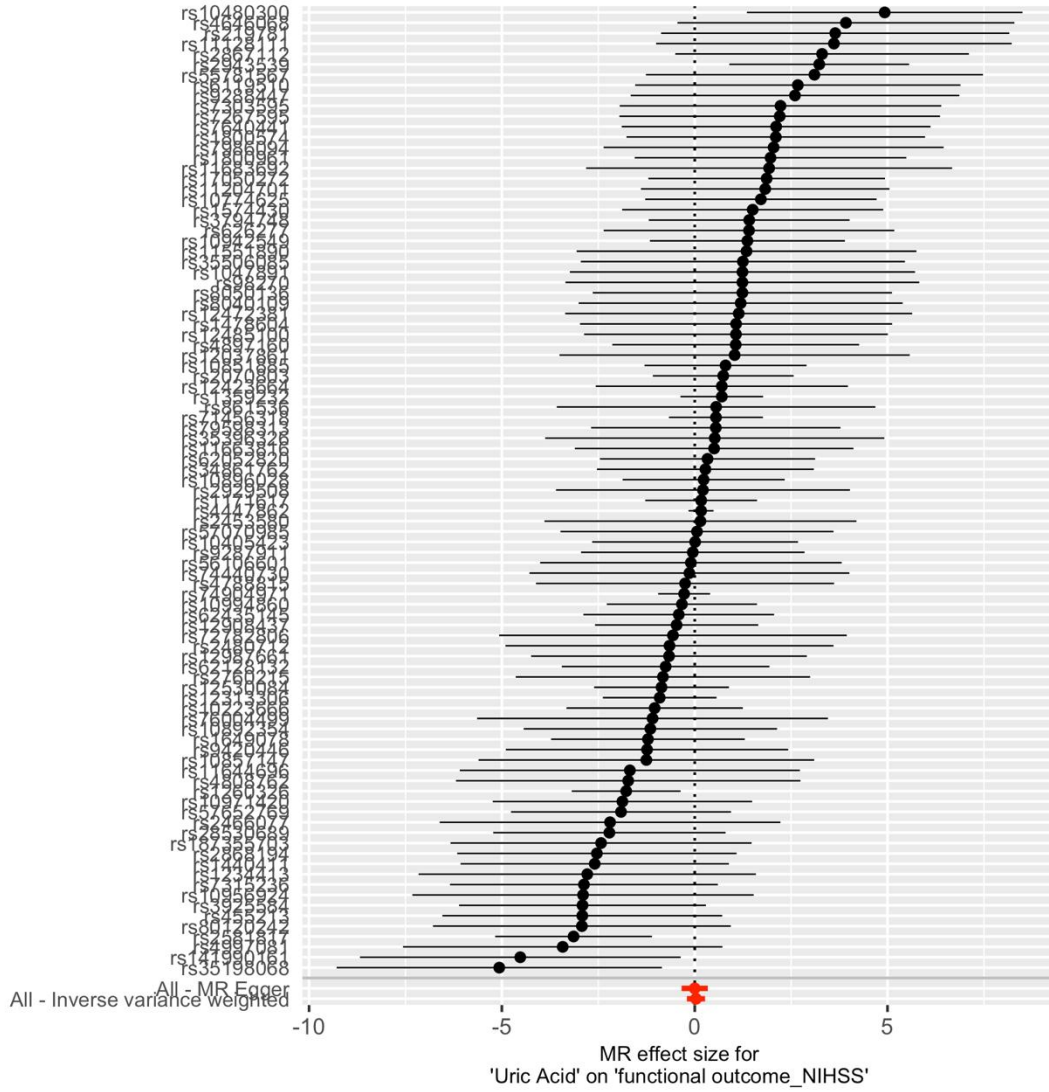

**Figure S10** The forest plot for the association between serum uric acid and functional outcome of stroke.

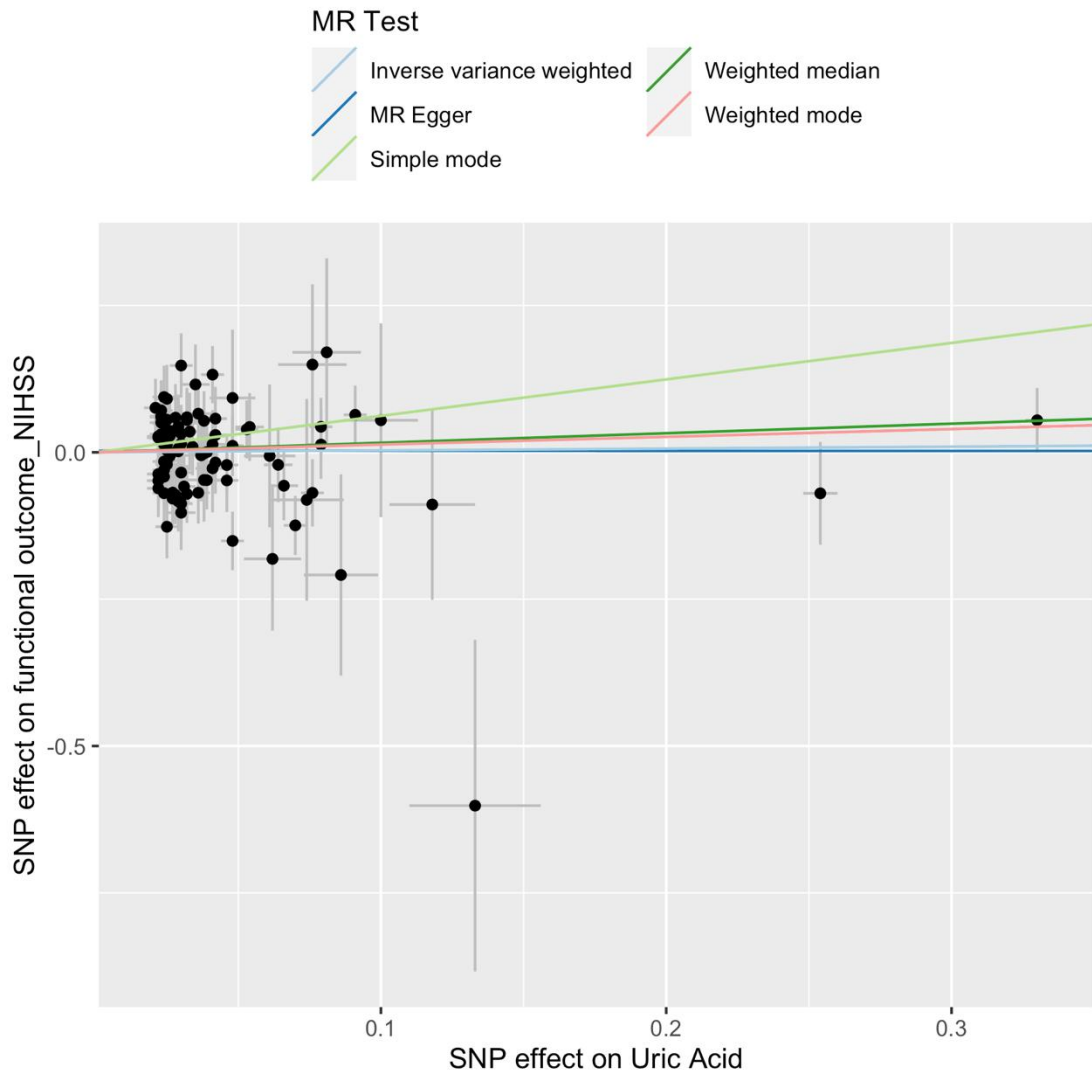

**Figure S11 The scatter plot for the association between serum uric acid and functional outcome of stroke.**

Note: The plot presents the effect size and confidence intervals for each SNP presented in the model on serum uric acid (exposure) and functional outcome of stroke (outcome). The slope of the plotted lines represents the Mendelian randomization associations with different approaches.

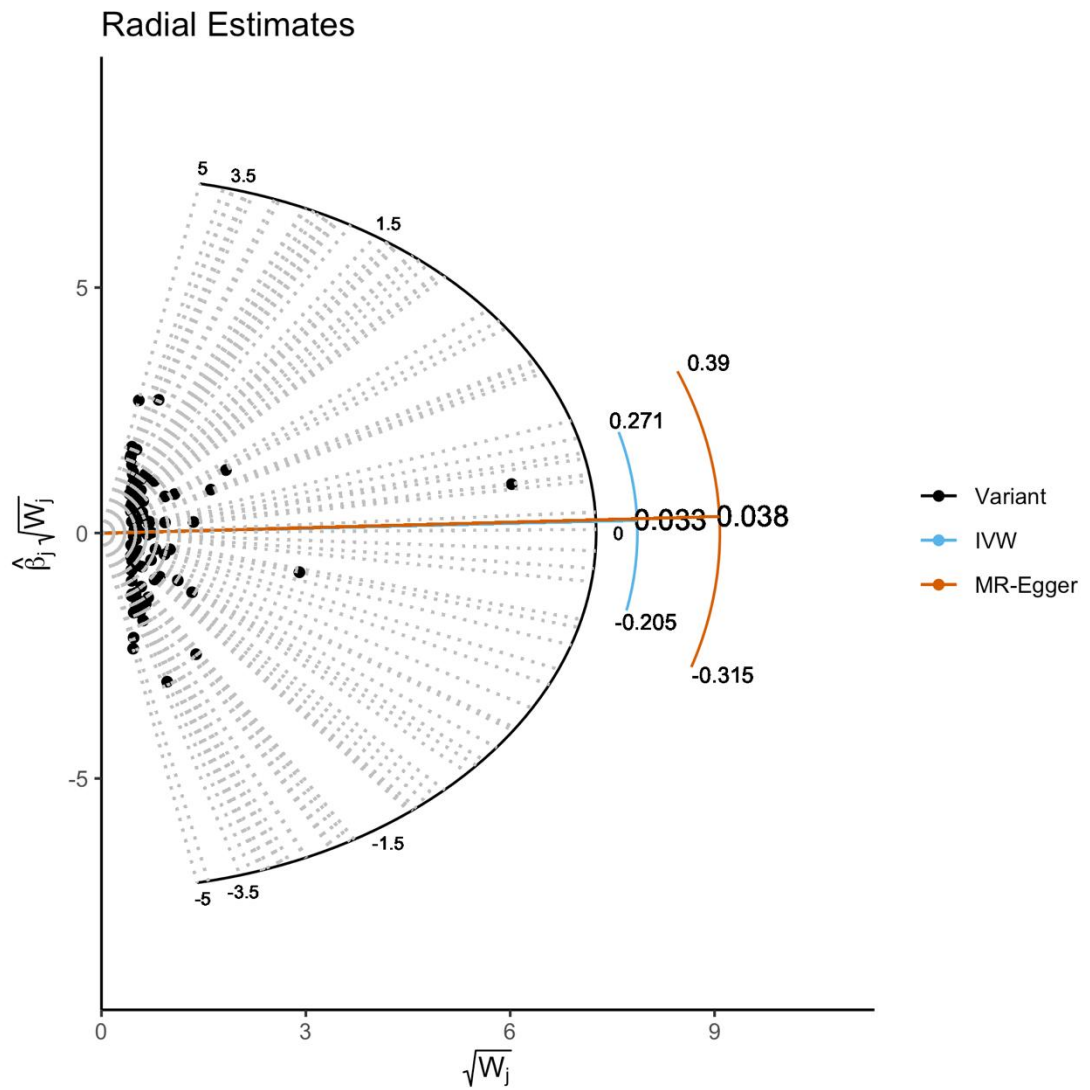

**Figure S12 The Radial MR plot for the association between serum uric acid and functional outcome of stroke.**

Note: The radial curve means the ratio estimate for each SNP, no outlier is identified.



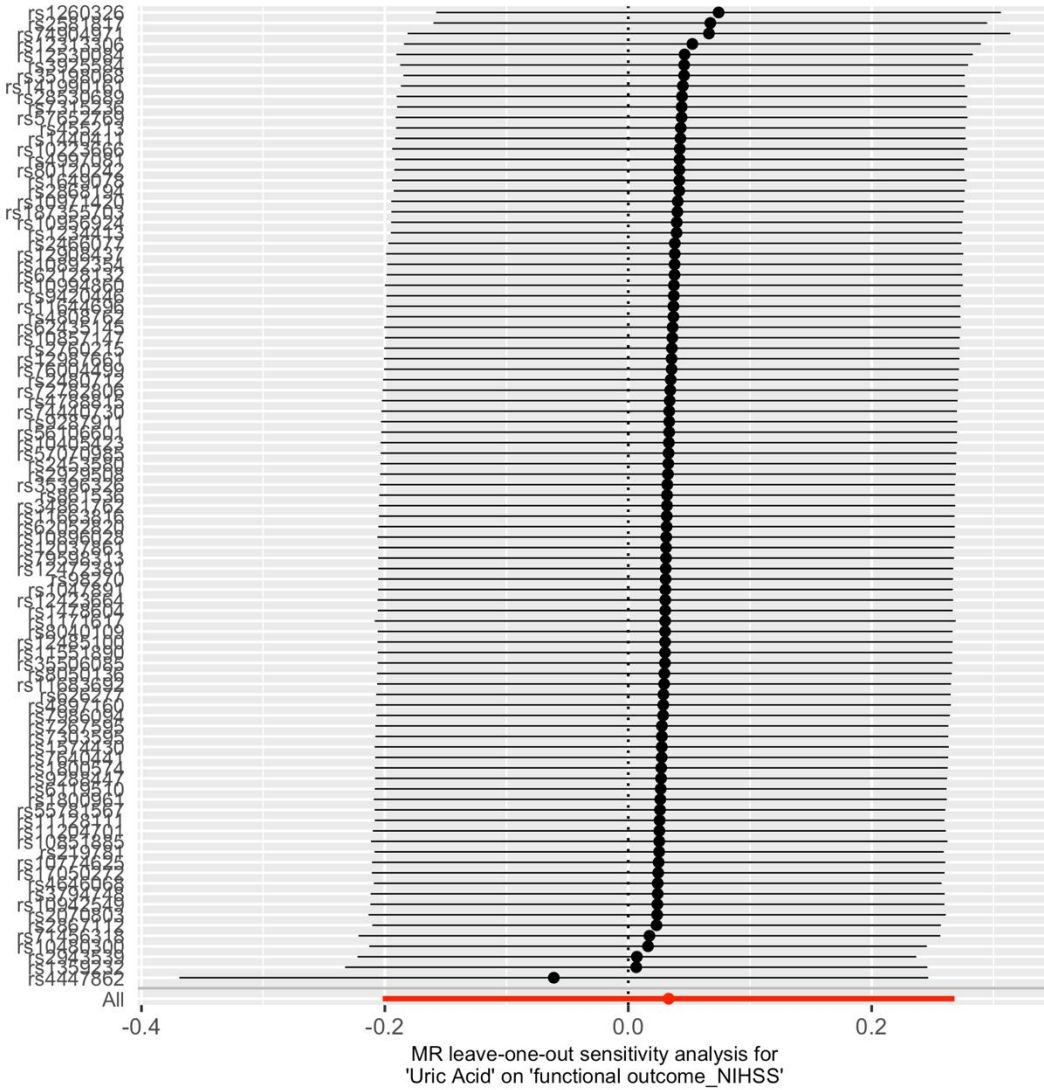

**Figure S13** The leave-one-out analysis for the association between serum uric acid and functional outcome of stroke.

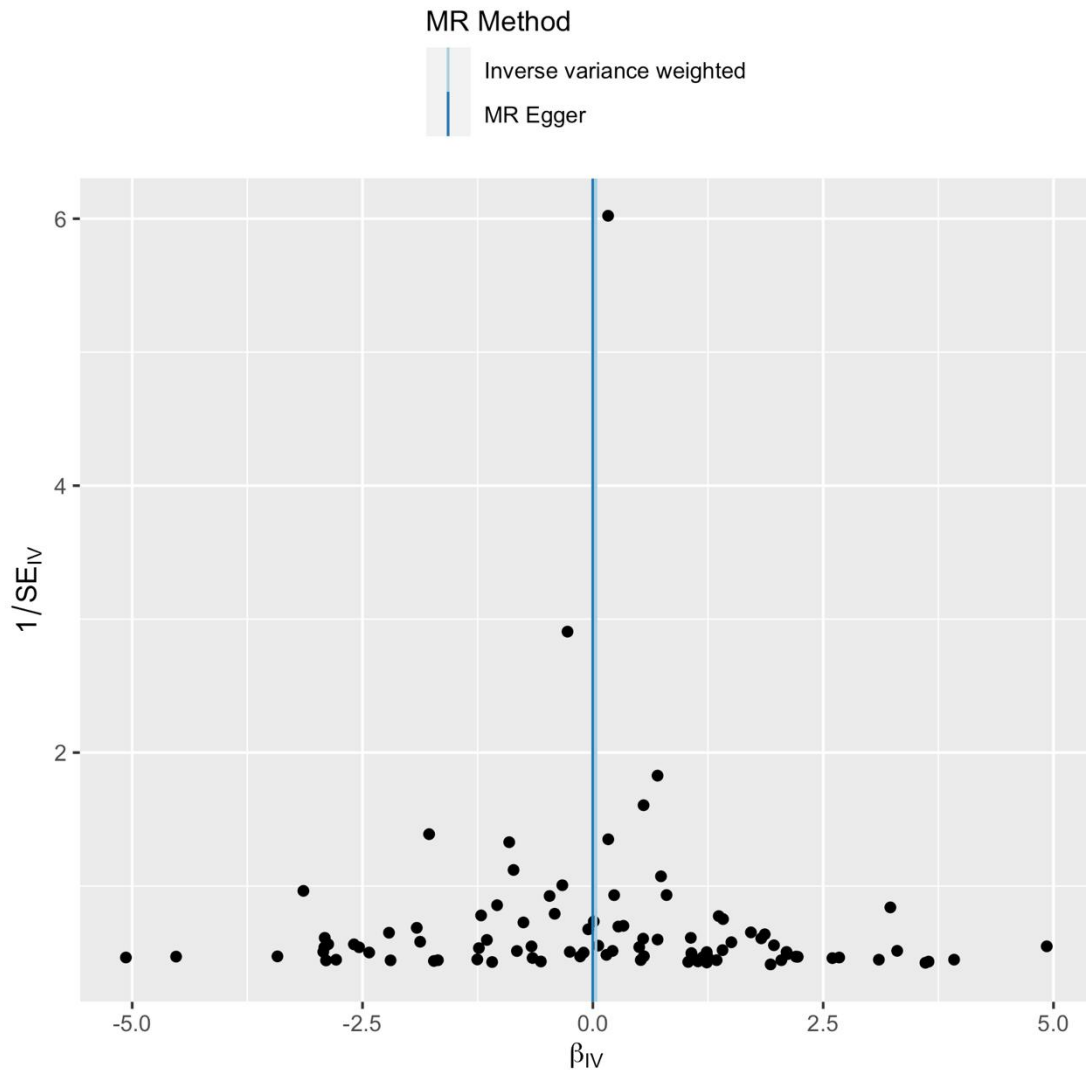

**Figure S14** The funnel plot for the association between serum uric acid and functional outcome of stroke.

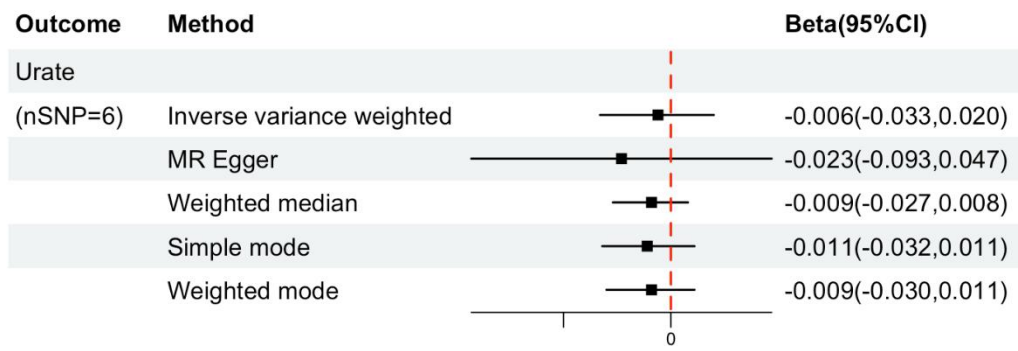

**Figure S15 The reverse causal effect of functional outcome of stroke on serum uric acid levels using different statistical models.**

Abbreviations: CI, confidence interval.
